# Supplementary material
Source: publisher site journal article supplement (https://www.degruyterbrill.com/publication/isbn/9781501520815/downloadAsset/9781501520815_Supplement%20Chapter%207.zip)
Supplement: Supplementary file 1 [file 7_EXOPLANETS_PUTIRKA_supp1.xlsx]

## Sheet: Calc as spinel perid
														Transofrmation Matrices
			Instructions:													SiO2	Al2O3	FmO	CaO		Total cations				SiO2	AlO1.5								FMO	CaO
			1) Enter bulk composition of peridotite or pyroxenite in columns D to M											Olivine	(Mg,Fe)2SiO4	1	0	2	0		3		Olivine	(Mg,Fe)2SiO4	1	0								2	0	3
			2) Output is in columns O to V, which provide mole fractions of ol, cpx, opx and gar											Clinpyroxene	Ca(Mg,Fe)Si2O6	1.8	0.3	1.3	0.6		4		Clinopyroxine	Ca(Mg,Fe)Si2O6	2	0.1								1.2	0.7	4
			3) For plotting purposes, ol, cpx and opx are renormalized to unity (columns T to V)											Orthopyroxene	(Mg,Fe)2Si2O6	1.8	0.3	1.8	0.1		4		Orthopyroxine	(Mg,Fe)2Si2O6	1.9	0.1								1.9	0.1	4
			4) For a triangular plot, use x-y coordinates in Columns X and Y (see chart sheet "Tri plot")											Garnet	(Mg,Fe,Ca)3Al2Si3O12	3	2	2.7	0.3		8		Garnet	(Mg,Fe,Ca)3Al2Si3O12	3	2								2.7	0.3	8
			Notes:													Olivine	Clinpyroxene	Orthopyroxene	Garnet						SiO2	Al2O3								FmO	CaO
			1) Mole fractions of minerals are calculated using the transofrmation matrices in													(Mg,Fe)2SiO4	Ca(Mg,Fe)Si2O6	(Mg,Fe)2Si2O6	(Mg,Fe,Ca)3Al2Si3O12					(Mg,Fe)2SiO4	1	0								2	0
			cells 3 to T6, and he inverse of this matrix in cells P11 to S14												SiO2	-1.16	-0.176	1.776	-0.24					Ca(Mg,Fe)Si2O6	2	0								1	1
			You can make changes to cells Q10 to T13 to change the calcualted mineralogy												Al2O3	0.12	-0.168	-1.032	0.68					(Mg,Fe)2Si2O6	2	0								2	0
			2) Columns X and Y use a trigonometric transformation of ternary coordinates												FmO	1.08	0.088	-0.888	0.12					(Mg,Fe)3Al2Si3O12	3	1								3	0
			into x-y coordinates that can be plotted in Excel. They are set up so that Ol plots												CaO	1.08	2.088	-2.888	0.12
			at the top apex and opx plots at the bottom left apex.
			Peridotites from Warren, J.W. (2016) Global variation in abyssal peridotite compositions, Lithos, 248-251, 193-219.
																							For Plotting
			Input											Output									left	right
			Peridotite Bulk compositons																Renormalized					Ol
			SiO2	TiO2	Al2O3	FeO	MnO	MgO	CaO	Na2O	K2O	Cr2O3		Ol	Cpx	Opx	Gar	Sum	Opx	Cpx	Ol	sum	X	Y	perid	Msw-perid	pyrox	Qz-pyrox	FmO/SiO2	perid	Msw-perid	pyrox	Qz-pyrox	FmO	SiO2	TiO2	Al2O3	FeO	MnO	MgO	CaO	Na2O	K2O	Cr2O3		SiO2	TiO2	Al2O3	FeO
Warren (2016)		AII20-17-63	48.62	0.117	8.36	5.12	0.066	26.85	7.5	0.773	0.007	0.449		0.0252418	0.39355	0.652228	-0.0710199	1	0.608978	0.367454	0.023568	1	0.437906	0.023568	0	0	1	0	0.657548	0	0	0	1	31.97	0.809254	0.00146433	0.0819929	0.0712596	0.000930364	0.666253	0.133738	0.0124718	7.431e-05	0.00295398	1.78039	0.454537	0.000822476	0.0460533	0.0400246
Warren (2016)		AII20-17-96	44.26	0.084	4.97	7.78	0.14	39.13	2.96	0.318	0.004	0.126		0.643912	0.115967	0.253578	-0.0134577	1	0.250211	0.114427	0.635362	1	0.498956	0.635362	1	0	0	0	1.05987	1	0	0	0	46.91	0.736684	0.00105131	0.0487446	0.108281	0.0019735	0.970968	0.0527817	0.00513069	4.24628e-05	0.000828957	1.92649	0.382398	0.000545716	0.0253023	0.0562065
Warren (2016)		920D-2R2-33-38	42.7579	0.00637	1.05038	9.1237	0.13018	47.7489	0.3426	0.00187		0.10809		0.9003	0.00181733	0.106369	-0.00848674	1	0.105474	0.00180203	0.892724	1	0.517495	0.892724	1	0	0	0	1.33011	1	0	0	0	56.8726	0.711682	7.97247e-05	0.0103019	0.126983	0.00183507	1.18484	0.00610913	3.0171e-05	0	0.000711127	2.04257	0.348425	3.90316e-05	0.00504359	0.0621681
Warren (2016)		920B-2R1-20-26	45.5257	0.00867	1.42609	7.86852	0.14004	45.3825	0.31629	0.00285		0.24807		0.721067	-0.0236623	0.339013	-0.0364173	1	0.3271	-0.0228309	0.69573	1	0.375317	0.69573	1	0	0	0	1.16969	1	0	0	0	53.2511	0.757751	0.000108511	0.0139868	0.109513	0.00197406	1.12612	0.00563998	4.59826e-05	0	0.00163206	2.01677	0.375725	5.38042e-05	0.00693523	0.0543013
Warren (2016)		920D-16R3-64-70	43.5115	0.01079	1.42064	8.36559	0.131	46.1423	1.07369	0.00682		0.18069		0.835866	0.032502	0.148016	-0.0163843	1	0.14563	0.031978	0.822392	1	0.511733	0.822392	1	0	0	0	1.25272	1	0	0	0	54.5079	0.724227	0.000135044	0.0139333	0.116431	0.00184663	1.14497	0.0191457	0.000110035	0	0.00118876	2.02199	0.358176	6.67877e-05	0.0068909	0.0575827
Warren (2016)		920B-10R1-102-108	43.1841	0.00838	1.18946	8.71025	0.1389	47.1806	0.28244	0.00316		0.14426		0.863945	-0.00646871	0.156102	-0.0135789	1	0.154011	-0.00638205	0.852371	1	0.484747	0.852371	1	0	0	0	1.29425	1	0	0	0	55.8909	0.718776	0.000104881	0.0116659	0.121228	0.00195799	1.17074	0.00503638	5.09842e-05	0	0.00094909	2.0305	0.353989	5.16527e-05	0.00574534	0.0597035
Warren (2016)		RC27-9-6-8	44.7983	0.0392255	2.2771	8.29073	0.111548	42.9993	1.83393	0.0324849		0.252097		0.718608	0.0596352	0.250436	-0.0286789	1	0.243454	0.0579726	0.698574	1	0.470263	0.698574	1	0	0	0	1.14491	1	0	0	0	51.29	0.745644	0.000490932	0.0223333	0.115389	0.00157243	1.06698	0.0327021	0.000524119	0	0.00165856	1.98729	0.375206	0.000247036	0.011238	0.0580635
Warren (2016)		920B-13R1-66-72	43.5969	0.00821	1.0644	8.41174	0.12803	46.5832	0.61244	0.00241		0.18052		0.834387	0.00818553	0.177271	-0.0198436	1	0.173822	0.00802626	0.818152	1	0.481628	0.818152	1	0	0	0	1.26144	1	0	0	0	54.995	0.725647	0.000102753	0.0104394	0.117074	0.00180476	1.15591	0.0109208	3.88835e-05	0	0.00118765	2.02313	0.358676	5.07894e-05	0.00516003	0.0578677
Warren (2016)		920D-14R4-76-82	45.0402	0.01376	1.3936	8.08109	0.13145	44.5481	1.12908	0.00746		0.24087		0.733313	0.023409	0.277771	-0.0344933	1	0.268509	0.0226284	0.708862	1	0.435391	0.708862	1	0	0	0	1.16849	1	0	0	0	52.6292	0.74967	0.000172215	0.0136681	0.112472	0.00185297	1.10541	0.0201334	0.000120361	0	0.00158469	2.00509	0.373884	8.58893e-05	0.00681672	0.0560932
Warren (2016)		6K-643-01	44.2031	0.0225812	1.47349	8.31307	0.13223	43.9431	2.25398	0.02208		0.220859		0.772444	0.0908612	0.163566	-0.0268717	1	0.159286	0.0884835	0.75223	1	0.536472	0.75223	1	0	0	0	1.18218	1	0	0	0	52.2562	0.735737	0.000282619	0.0144516	0.1157	0.00186397	1.0904	0.0401922	0.000356244	0	0.00145304	2.00044	0.367788	0.000141279	0.00722425	0.0578375
Warren (2016)		EDUL-59-2-2	43.7242	0.01691	1.52945	8.8796	0.1583	44.9169	1.11932	0.0112		0.22647		0.803283	0.0311532	0.186551	-0.0209875	1	0.182717	0.0305129	0.786771	1	0.489475	0.786771	1	0	0	0	1.23036	1	0	0	0	53.7965	0.727766	0.00021164	0.0150005	0.123585	0.00223146	1.11456	0.0199593	0.000180703	0	0.00148995	2.00499	0.362978	0.000105557	0.00748159	0.0616389
Warren (2016)		CIRCE-93-HD7	43.2893	0.00351	0.51558	7.41372	0.12011	48.6988	0.35063	0.01068		0.14023		0.878732	0.00121401	0.137009	-0.0169554	1	0.134725	0.00119377	0.864081	1	0.500256	0.864081	1	0	0	0	1.29622	1	0	0	0	56.1126	0.720528	4.39299e-05	0.00505669	0.103183	0.00169312	1.20841	0.00625232	0.000172314	0	0.000922577	2.04626	0.352119	2.14684e-05	0.00247119	0.0504254
Warren (2016)		920D-14R3-7-12	44.0706	0.01364	1.15289	8.4699	0.13116	45.01	1.42937	0.00688		0.18747		0.791486	0.0477752	0.187243	-0.0265048	1	0.182408	0.0465417	0.77105	1	0.498908	0.77105	1	0	0	0	1.2135	1	0	0	0	53.4799	0.733533	0.000170713	0.0113073	0.117883	0.00184889	1.11687	0.0254881	0.000111004	0	0.00123337	2.00845	0.365224	8.49977e-05	0.00562986	0.0586936
Warren (2016)		EDUL-21-5-1	44.5293	0.04742	2.36395	8.22381	0.16051	43.4441	1.38121	0.03619		0.26792		0.731068	0.0351924	0.259405	-0.0256653	1	0.252914	0.0343118	0.712774	1	0.45114	0.712774	1	0	0	0	1.16031	1	0	0	0	51.6679	0.741166	0.000593492	0.0231851	0.114458	0.00226262	1.07802	0.0246293	0.000583898	0	0.00176265	1.98666	0.373072	0.000298739	0.0116704	0.0576133
Warren (2016)		EDUL-42-4-3	45.2382	0.03711	2.09669	8.71431	0.13501	42.7896	1.10043	0.02106		0.27255		0.686393	0.0146036	0.334943	-0.0359397	1	0.323323	0.014097	0.66258	1	0.398819	0.66258	1	0	0	0	1.13851	1	0	0	0	51.5039	0.752965	0.000464456	0.0205638	0.121285	0.00190316	1.06178	0.0196225	0.000339787	0	0.00179311	1.98071	0.380149	0.000234489	0.010382	0.0612329
Warren (2016)		EDUL-21-5-2	45.5089	0.06244	2.10116	8.39302	0.09028	41.61	2.29284	0.0588		0.2716		0.660754	0.0802981	0.299242	-0.040294	1	0.287651	0.0771879	0.635161	1	0.455839	0.635161	1	0	0	0	1.09875	1	0	0	0	50.003	0.757471	0.000781477	0.0206077	0.116813	0.00127262	1.03251	0.0408852	0.000948693	0	0.00178686	1.97307	0.383904	0.000396071	0.0104445	0.0592036
Warren (2016)		920D-18R2-35-41	44.2081	0.01589	1.53409	8.41434	0.1373	45.2723	0.53676	0.00308		0.25487		0.777207	-0.00449776	0.252803	-0.0255126	1	0.246514	-0.00438587	0.757872	1	0.432493	0.757872	1	0	0	0	1.21441	1	0	0	0	53.6867	0.735821	0.000198874	0.015046	0.11711	0.00193544	1.12338	0.00957133	4.96934e-05	0	0.0016768	2.00479	0.367031	9.91991e-05	0.00750502	0.058415
Warren (2016)		920D-22R6-111-117	44.1485	0.0256	1.0382	8.12871	0.1142	45.5178	1.1861	0.0084		0.2084		0.792232	0.0346556	0.20054	-0.0274274	1	0.195187	0.0337305	0.771083	1	0.484133	0.771083	1	0	0	0	1.21514	1	0	0	0	53.6465	0.734829	0.000320401	0.0101824	0.113134	0.00160981	1.12947	0.0211501	0.000135528	0	0.00137107	2.01221	0.365186	0.000159228	0.00506033	0.0562241
Warren (2016)		920D-22R5-75-80	44.9308	0.004	2.1948	7.97021	0.1234	43.4824	1.3686	0.0024		0.2768		0.712521	0.0325994	0.285406	-0.0305261	1	0.276952	0.0316338	0.691415	1	0.435716	0.691415	1	0	0	0	1.14515	1	0	0	0	51.4526	0.74785	5.00626e-05	0.0215261	0.110928	0.0017395	1.07897	0.0244044	3.87222e-05	0	0.00182107	1.98733	0.37631	2.51909e-05	0.0108317	0.0558179
Warren (2016)		AII60-9-73-HD2	44.2617	0.001333	1.34144	8.09879	0.164119	44.6379	1.47214	0.00193		0.288017		0.769958	0.0473392	0.21122	-0.028517	1	0.205364	0.0460267	0.74861	1	0.485357	0.74861	1	0	0	0	1.19147	1	0	0	0	52.7367	0.736712	1.66834e-05	0.0131565	0.112718	0.00231349	1.10764	0.0262507	3.11391e-05	0	0.00189487	2.00073	0.368221	8.33862e-06	0.00657586	0.0563384
Warren (2016)		1274A-3R1-85-86	44.7432	0.0048845	0.857253	8.01819	0.138033	45.4758	0.769105	0.000942		0.207873		0.759052	0.00814994	0.267675	-0.0348771	1	0.258654	0.00787528	0.733471	1	0.432563	0.733471	1	0	0	0	1.19558	1	0	0	0	53.494	0.744727	6.11327e-05	0.00840774	0.111596	0.00194577	1.12843	0.0137144	1.51985e-05	0	0.0013676	2.01027	0.370462	3.04102e-05	0.0041824	0.0555132
Warren (2016)		920D-12R3-35-39	43.3653	0.01271	0.75666	8.60741	0.12124	46.4073	0.79395	0.0025		0.14743		0.841915	0.0200684	0.159255	-0.0212386	1	0.155943	0.0196511	0.824406	1	0.498662	0.824406	1	0	0	0	1.26863	1	0	0	0	55.0147	0.721793	0.000159074	0.00742115	0.119797	0.00170905	1.15155	0.0141575	4.03356e-05	0	0.000969946	2.01759	0.357749	7.88434e-05	0.00367822	0.0593762
Warren (2016)		RC27-9-18-45	43.5658	0.0220386	1.29225	8.9108	0.11706	45.5397	0.60639	0.0135		0.135631		0.815003	0.00492416	0.201177	-0.0211039	1	0.197019	0.00482239	0.798159	1	0.466386	0.798159	1	0	0	0	1.24984	1	0	0	0	54.4505	0.72513	0.000275827	0.012674	0.12402	0.00165013	1.13002	0.0108129	0.000217812	0	0.000892322	2.00569	0.361537	0.000137522	0.00631904	0.0618339
Warren (2016)		920D-22R3-38-43	43.5761	0.004	1.7527	8.00231	0.1175	45.2841	1.2762	0.0028		0.1752		0.809511	0.0400114	0.168326	-0.0178483	1	0.165375	0.0393098	0.795316	1	0.504567	0.795316	1	0	0	0	1.22284	1	0	0	0	53.2864	0.725301	5.00626e-05	0.0171901	0.111375	0.00165633	1.12367	0.0227568	4.51759e-05	0	0.00115265	2.0032	0.362071	2.49913e-05	0.0085813	0.0555986
Warren (2016)		920D-14R3-29-34	43.8932	0.0131	1.3701	8.0803	0.1094	45.2067	1.242	0.0052		0.2003		0.794377	0.0373306	0.192291	-0.0239987	1	0.187784	0.0364557	0.77576	1	0.489981	0.77576	1	0	0	0	1.21402	1	0	0	0	53.287	0.730579	0.000163955	0.0134376	0.112461	0.00154215	1.12175	0.0221469	8.3898e-05	0	0.00131778	2.00349	0.364654	8.18348e-05	0.00670712	0.0561325
Warren (2016)		HLY102-40-56	41.8933	0.000832632	0.226604	7.73305	0.113603	49.916	0.159181	0.00260959		0.0735458		0.956077	0.00191529	0.0478316	-0.00582352	1	0.0475547	0.0019042	0.950541	1	0.550994	0.950541	1	0	0	0	1.37609	0	1	0	0	57.6491	0.697292	1.04209e-05	0.00222248	0.107628	0.0016014	1.23861	0.00283846	4.21038e-05	0	0.00048386	2.05073	0.340021	5.08157e-06	0.00108375	0.0524827
Warren (2016)		920D-22R5-11-116	43.5985	0.00888	1.32252	8.31666	0.13164	45.7698	0.78925	0.00362		0.17574		0.814911	0.0148845	0.191059	-0.0208546	1	0.187156	0.0145805	0.798264	1	0.477714	0.798264	1	0	0	0	1.24056	1	0	0	0	54.0864	0.725674	0.000111139	0.012971	0.11575	0.00185565	1.13573	0.0140736	5.84059e-05	0	0.0011562	2.00738	0.361504	5.53652e-05	0.00646165	0.0576625
Warren (2016)		670A-8R1-32-36	42.8707	0.0131	1.8355	8.79501	0.134	45.4347	0.8434	0.0043		0.1858		0.842582	0.0199158	0.148773	-0.0112711	1	0.147115	0.0196938	0.833191	1	0.503783	0.833191	1	0	0	0	1.26496	1	0	0	0	54.2297	0.71356	0.000163955	0.0180022	0.122408	0.00188892	1.12741	0.0150392	6.93772e-05	0	0.00122238	1.99977	0.356822	8.19871e-05	0.00900213	0.0612111
Warren (2016)		920D-22R2-4-9	44.0733	0.0137	1.4637	7.9184	0.0896	44.7551	1.5728	0.0035		0.2194		0.779834	0.0538093	0.192025	-0.0256684	1	0.187219	0.0524627	0.760318	1	0.499549	0.760318	1	0	0	0	1.19513	1	0	0	0	52.6735	0.733577	0.000171464	0.0143556	0.110207	0.00126304	1.11055	0.0280456	5.64698e-05	0	0.00144344	1.99967	0.366849	8.57464e-05	0.00717901	0.0551129
Warren (2016)		920D-15R5-14-22	42.2586	0.00834	0.99306	8.58423	0.13036	47.2477	0.7628	0.00406		0.09832		0.903183	0.0252757	0.0799323	-0.00839109	1	0.0792671	0.0250654	0.895667	1	0.546057	0.895667	1	0	0	0	1.3212	1	0	0	0	55.8319	0.703373	0.00010438	0.0097397	0.119474	0.00183761	1.1724	0.013602	6.5505e-05	0	0.00064685	2.02124	0.34799	5.16418e-05	0.00481867	0.0591094
Warren (2016)		920D-22R4-104-109	43.9924	0.0055	1.4446	8.0257	0.0641	45.3426	0.9977	0.0015		0.2016		0.789418	0.0229292	0.211845	-0.0241924	1	0.206841	0.0223876	0.770771	1	0.470856	0.770771	1	0	0	0	1.21313	1	0	0	0	53.3683	0.73223	6.8836e-05	0.0141683	0.111701	0.00090358	1.12513	0.0177907	2.42014e-05	0	0.00132633	2.00334	0.365505	3.43606e-05	0.00707234	0.0557573
Warren (2016)		EDUL-3-1	44.5741	0.01483	1.54962	8.13666	0.13826	44.0387	1.31074	0.03878		0.26844		0.739594	0.0343844	0.257876	-0.0318541	1	0.249915	0.0333229	0.716762	1	0.452301	0.716762	1	0	0	0	1.17053	1	0	0	0	52.1754	0.741913	0.000185607	0.0151983	0.113245	0.00194897	1.09277	0.0233727	0.000625686	0	0.00176607	1.99103	0.372628	9.32217e-05	0.0076334	0.0568777
Warren (2016)		920D-15R1-8-15	44.6074	0.0157	1.50876	8.2678	0.12952	44.2204	1.0385	0.00724		0.27208		0.740016	0.0192034	0.27295	-0.03217	1	0.264443	0.0186049	0.716952	1	0.435415	0.716952	1	0	0	0	1.17667	1	0	0	0	52.4882	0.742466	0.000196496	0.0147976	0.11507	0.00182577	1.09728	0.0185182	0.000116812	0	0.00179002	1.99206	0.372713	9.86394e-05	0.00742827	0.0577645
Warren (2016)		S22-20-06	43.6043	0.01055	0.96216	8.42551	0.13784	46.1617	0.56657	0.00554		0.18607		0.820721	0.00444742	0.197936	-0.0231042	1	0.193466	0.00434698	0.802187	1	0.468162	0.802187	1	0	0	0	1.25188	1	0	0	0	54.5872	0.72577	0.00013204	0.00943664	0.117265	0.00194305	1.14545	0.0101029	8.93837e-05	0	0.00122416	2.01141	0.360826	6.56454e-05	0.00469154	0.0582999
Warren (2016)		Naut-KN14-8	43.6993	0.0364	1.50144	7.97602	0.11912	44.8547	1.58983	0.03552		0.2166		0.797161	0.056859	0.168252	-0.0222716	1	0.164586	0.0556202	0.779794	1	0.514439	0.779794	1	0	0	0	1.20896	1	0	0	0	52.8307	0.727353	0.000455569	0.0147258	0.111009	0.00167917	1.11302	0.0283493	0.000573088	0	0.00142502	1.99859	0.363933	0.000227945	0.00736808	0.0555438
Warren (2016)		PS59-238-75	43.7545	0.0426814	2.73499	7.91447	0.138867	42.927	2.16728	0.0541327		0.2246		0.756671	0.0829	0.177941	-0.0175119	1	0.174879	0.0814732	0.743648	1	0.523422	0.743648	1	0	0	0	1.16197	1	0	0	0	50.8415	0.728271	0.000534185	0.0268241	0.110153	0.00195752	1.06519	0.0386462	0.00087339	0	0.00147765	1.97392	0.368946	0.000270621	0.0135893	0.055804
Warren (2016)		S22-20-04	44.0535	0.00804	1.342	7.99428	0.14438	45.7009	0.50136	0.00774		0.1857		0.786177	-0.00468274	0.244199	-0.0256937	1	0.238082	-0.00456543	0.766484	1	0.437258	0.766484	1	0	0	0	1.21886	1	0	0	0	53.6951	0.733248	0.000100626	0.013162	0.111264	0.00203524	1.13402	0.00894009	0.000124879	0	0.00122172	2.00411	0.365872	5.02096e-05	0.00656751	0.0555176
Warren (2016)		CIRCE-93-HD3	43.5649	0.02147	0.8362	7.32536	0.10313	47.513	0.42847	0.00424		0.13171		0.839223	-0.000490642	0.182299	-0.0210314	1	0.178544	-0.000480536	0.821937	1	0.473991	0.821937	1	0	0	0	1.25878	1	0	0	0	54.8384	0.725114	0.000268711	0.00820126	0.101954	0.00145376	1.17898	0.00764034	6.84092e-05	0	0.000866523	2.02455	0.358161	0.000132726	0.0040509	0.0503586
Warren (2016)		Naut-KN15-3	43.0217	0.02989	1.654	8.56412	0.15781	44.6493	1.63958	0.02212		0.1729		0.826203	0.0630064	0.126533	-0.0157429	1	0.124572	0.0620299	0.813398	1	0.541242	0.813398	1	0	0	0	1.2369	1	0	0	0	53.2135	0.716073	0.000374093	0.016222	0.119194	0.00222456	1.10792	0.0292364	0.000356889	0	0.00113751	1.99274	0.35934	0.000187727	0.00814056	0.0598143
Warren (2016)		Naut-SP03-12	43.6798	0.0293609	1.24676	8.09654	0.12143	45.0579	1.42155	0.021996		0.230577		0.800527	0.0485613	0.174926	-0.0240139	1	0.170824	0.0474225	0.781754	1	0.506105	0.781754	1	0	0	0	1.21691	1	0	0	0	53.1544	0.727027	0.000367471	0.0122279	0.112687	0.00171172	1.11806	0.0253485	0.000354889	0	0.00151697	1.9993	0.36364	0.000183799	0.0061161	0.056363
Warren (2016)		EDUL-24-1	44.176	0.0686	2.46316	9.11672	0.12644	42.0849	1.58382	0.06738		0.21514		0.721589	0.0462828	0.258234	-0.0261056	1	0.251664	0.0451053	0.703231	1	0.458093	0.703231	1	0	0	0	1.15904	1	0	0	0	51.2016	0.735287	0.000858573	0.0241581	0.126885	0.00178235	1.04429	0.0282422	0.00108712	0	0.00141541	1.96401	0.374381	0.000437154	0.0123004	0.0646054
Warren (2016)		895D-7R2-129-133	42.7757	0.003341	0.418499	8.36569	0.141001	47.3469	0.687869	0.000278		0.117187		0.879583	0.0200052	0.118015	-0.0176038	1	0.115974	0.0196591	0.864367	1	0.521743	0.864367	1	0	0	0	1.30243	1	0	0	0	55.7126	0.711979	4.18148e-05	0.00410454	0.116433	0.00198761	1.17486	0.0122659	4.48532e-06	0	0.000770974	2.02245	0.352038	2.06753e-05	0.00202949	0.0575702
Warren (2016)		895D-3R1-38-43	43.2815	0.008445	0.679131	8.19411	0.09988	46.9665	0.461263	0.007124		0.155794		0.84669	0.00283028	0.171566	-0.0210865	1	0.168023	0.00277183	0.829205	1	0.481942	0.829205	1	0	0	0	1.27446	1	0	0	0	55.1606	0.720398	0.000105695	0.00666076	0.114045	0.00140795	1.16542	0.00822509	0.00011494	0	0.00102497	2.0174	0.357091	5.23914e-05	0.00330165	0.0565304
Warren (2016)		Van7-85-47	43.8934	0.0363646	2.38919	8.58033	0.147997	42.796	1.73017	0.0321351		0.243947		0.747264	0.0576849	0.217477	-0.0224265	1	0.212707	0.0564196	0.730873	1	0.487118	0.730873	1	0	0	0	1.17048	1	0	0	0	51.3763	0.730582	0.000455127	0.0234326	0.11942	0.00208622	1.06193	0.0308518	0.000518475	0	0.00160493	1.97089	0.370687	0.000230925	0.0118894	0.0605921
Warren (2016)		Kn180-14-37	42.9683	0.011041	0.924279	8.25472	0.126048	46.0346	1.30187	0.0547999		0.168081		0.850723	0.0486651	0.118771	-0.0181591	1	0.116653	0.0477972	0.83555	1	0.537596	0.83555	1	0	0	0	1.26347	1	0	0	0	54.2893	0.715185	0.000138185	0.00906512	0.114888	0.00177683	1.1423	0.0232145	0.000884154	0	0.00110581	2.00856	0.356069	6.8798e-05	0.00451325	0.0571994
Warren (2016)		PS86-6-26	45.7125	0.0771407	2.86506	7.70395	0.0949933	40.0982	2.94308	0.110682		0.237532		0.610217	0.112707	0.31844	-0.0413647	1	0.305791	0.10823	0.585978	1	0.463288	0.585978	1	0	0	0	1.04571	1	0	0	0	47.8021	0.76086	0.000965465	0.0280999	0.107223	0.00133907	0.994992	0.05248	0.00178577	0	0.00156273	1.94931	0.390323	0.000495286	0.0144153	0.0550055
Warren (2016)		670A-6R1-54-56	43.005	0.0165	1.3717	8.672	0.1693	45.2342	1.1857	0.0102		0.1767		0.834062	0.0393202	0.143602	-0.0169849	1	0.141204	0.0386635	0.820133	1	0.518149	0.820133	1	0	0	0	1.25349	1	0	0	0	53.9062	0.715796	0.000206508	0.0134533	0.120696	0.00238652	1.12244	0.021143	0.000164569	0	0.00116251	1.99744	0.358356	0.000103386	0.00673526	0.0604252
Warren (2016)		1274A-8R1-40-43	45.0905	0.0104493	0.993526	7.91281	0.12929	44.4387	0.978319	0.005632		0.27604		0.719512	0.0147696	0.306236	-0.0405181	1	0.294311	0.0141944	0.691494	1	0.415625	0.691494	1	0	0	0	1.16103	1	0	0	0	52.3515	0.750508	0.00013078	0.00974427	0.11013	0.00182252	1.1027	0.0174451	9.0868e-05	0	0.00181607	1.99438	0.376311	6.55742e-05	0.00488586	0.0552199
Warren (2016)		V3306-IN19-M	43.9279	0.02571	1.99113	9.38436	0.11066	43.0348	1.10424	0.00243		0.24348		0.750884	0.023358	0.25136	-0.025602	1	0.245086	0.0227749	0.732139	1	0.448999	0.732139	1	0	0	0	1.1933	1	0	0	0	52.4192	0.731157	0.000321777	0.0195285	0.13061	0.00155991	1.06786	0.0196904	3.92062e-05	0	0.00160186	1.97237	0.3707	0.000163142	0.00990105	0.06622
Warren (2016)		EDUL-21-7-2	44.7207	0.03784	1.57568	8.44124	0.13865	43.7622	0.89814	0.02189		0.22642		0.722289	0.00909912	0.3032	-0.0345887	1	0.293064	0.00879492	0.698141	1	0.413228	0.698141	1	0	0	0	1.16732	1	0	0	0	52.2035	0.744352	0.000473592	0.0154539	0.117484	0.00195447	1.08591	0.0160153	0.000353178	0	0.00148962	1.98349	0.375274	0.000238767	0.00779128	0.0592311
Warren (2016)		6K-643-06	44.2572	0.02015	1.0183	8.05657	0.12084	45.2342	0.88472	0.01874		0.20228		0.77248	0.0159386	0.242602	-0.0310206	1	0.235303	0.015459	0.749238	1	0.450424	0.749238	1	0	0	0	1.20411	1	0	0	0	53.2907	0.736638	0.00025219	0.00998725	0.11213	0.00170341	1.12244	0.015776	0.000302356	0	0.00133081	2.00056	0.368217	0.00012606	0.00499224	0.0560496
Warren (2016)		895C-3R1-35-39	42.9129	0.011811	0.592825	8.78261	0.148277	46.5526	0.646431	4.13333e-05		0.127272		0.859909	0.0149236	0.144676	-0.019509	1	0.141908	0.0146381	0.843454	1	0.503871	0.843454	1	0	0	0	1.28948	1	0	0	0	55.3352	0.714262	0.000147822	0.00581429	0.122235	0.00209018	1.15515	0.0115269	6.66882e-07	0	0.000837324	2.01207	0.35499	7.34679e-05	0.00288971	0.0607512
Warren (2016)		1274A-1R1-27-31	43.5133	0.006119	0.812674	8.21269	0.111129	46.4879	0.469335	0.001448		0.153337		0.826704	0.000363648	0.196325	-0.0233923	1	0.191837	0.000355336	0.807808	1	0.466798	0.807808	1	0	0	0	1.2571	1	0	0	0	54.7006	0.724256	7.65832e-05	0.00797052	0.114303	0.00156652	1.15355	0.00836903	2.33624e-05	0	0.00100881	2.01112	0.360126	3.80799e-05	0.00396322	0.0568356
Warren (2016)		AII32-8-6	43.2243	0.010396	0.443643	7.91624	0.106476	47.6026	0.419935	0.00172		0.038665		0.859527	0.00290704	0.158487	-0.0209213	1	0.15524	0.00284747	0.841913	1	0.489367	0.841913	1	0	0	0	1.28444	1	0	0	0	55.5188	0.719445	0.000130113	0.00435115	0.110177	0.00150093	1.18121	0.00748814	2.77509e-05	0	0.000254378	2.02458	0.355355	6.42665e-05	0.00214916	0.0544198
Warren (2016)		AII20-17-29	42.193	0.013914	0.864477	9.04842	0.136472	46.9394	0.514651	0.005508		0.040788		0.898348	0.0117446	0.100255	-0.0103475	1	0.0992281	0.0116243	0.889148	1	0.526772	0.889148	1	0	0	0	1.32695	1	0	0	0	55.9878	0.70228	0.000174143	0.00847859	0.125935	0.00192377	1.16475	0.00917709	8.88674e-05	0	0.000268345	2.01307	0.348859	8.65059e-05	0.00421176	0.0625585
Warren (2016)		Kn180-Jas112-84	44.249	0.0184739	1.38798	8.17066	0.12694	44.1165	1.42211	0.0087332		0.250731		0.755113	0.0430908	0.232408	-0.0306122	1	0.225505	0.0418109	0.732684	1	0.471294	0.732684	1	0	0	0	1.18166	1	0	0	0	52.2872	0.736502	0.000231213	0.013613	0.113718	0.0017894	1.0947	0.0253586	0.000140903	0	0.00164956	1.98771	0.370529	0.000116322	0.0068486	0.0572108
Warren (2016)		PS59-235-17	44.5674	0.0442925	2.70959	7.89678	0.12734	42.2715	1.84347	0.0702681		0.2093		0.699426	0.057929	0.270245	-0.0275995	1	0.262986	0.0563731	0.680641	1	0.458062	0.680641	1	0	0	0	1.12567	1	0	0	0	50.1682	0.741801	0.000554349	0.0265751	0.109906	0.00179504	1.04892	0.0328721	0.00113372	0	0.00137699	1.96493	0.377519	0.000282121	0.0135247	0.0559339
Warren (2016)		1274A-18R1-13-16	44.1851	0.010979	1.13846	7.80901	0.112387	45.2714	0.976556	0.010592		0.225313		0.774662	0.0209628	0.233917	-0.0295413	1	0.227205	0.0203613	0.752434	1	0.457929	0.752434	1	0	0	0	1.20132	1	0	0	0	53.0804	0.735438	0.000137409	0.0111658	0.108685	0.00158425	1.12336	0.0174136	0.000170894	0	0.00148234	1.99944	0.367823	6.8724e-05	0.00558446	0.0543577
Warren (2016)		PS59-235-01	42.4607	0.0279355	1.96241	8.45565	0.13241	45.0464	1.43507	0.0568439		0.159377		0.853249	0.0541207	0.100784	-0.00815357	1	0.0999687	0.053683	0.846348	1	0.550627	0.846348	1	0	0	0	1.26004	1	0	0	0	53.5021	0.706736	0.00034963	0.0192469	0.117685	0.00186651	1.11778	0.0255896	0.000917133	0	0.00104854	1.99122	0.354927	0.000175586	0.00966588	0.0591019
Warren (2016)		Naut-KN14-6	44.3689	0.02819	1.17822	8.42968	0.12241	44.2829	1.08547	0.01628		0.19745		0.751759	0.0243528	0.257029	-0.0331409	1	0.248784	0.0235717	0.727644	1	0.447324	0.727644	1	0	0	0	1.18805	1	0	0	0	52.7126	0.738497	0.000352816	0.0115557	0.117323	0.00172554	1.09883	0.0193557	0.000262665	0	0.00129903	1.9892	0.371253	0.000177366	0.00580921	0.05898
Warren (2016)		895D-3R1-116-120	42.5397	0.006721	0.513028	8.47578	0.156631	47.3092	0.576732	3.3e-05		0.125403		0.886665	0.0146825	0.114171	-0.0155189	1	0.112426	0.0144581	0.873115	1	0.520788	0.873115	1	0	0	0	1.31136	1	0	0	0	55.785	0.708051	8.41176e-05	0.00503166	0.117965	0.00220794	1.17393	0.0102841	5.3243e-07	0	0.00082503	2.01838	0.350802	4.16759e-05	0.00249293	0.0584455
Warren (2016)		VULC5-41-55	43.5194	0.028982	1.56794	8.43073	0.112629	44.4154	1.40494	0.033649		0.167419		0.794409	0.046426	0.181234	-0.0220694	1	0.177321	0.0454235	0.777255	1	0.501199	0.777255	1	0	0	0	1.21431	1	0	0	0	52.8461	0.724358	0.000362728	0.015378	0.117338	0.00158767	1.10212	0.0250524	0.000542901	0	0.00110145	1.98784	0.364394	0.000182474	0.00773602	0.0590279
Warren (2016)		1274A-1R1-65-66	44.4167	0.0108913	1.08694	7.83497	0.117204	44.8653	1.09082	0.00310833		0.253913		0.757175	0.0254139	0.250469	-0.0330579	1	0.242454	0.0246006	0.732945	1	0.451573	0.732945	1	0	0	0	1.1865	1	0	0	0	52.7003	0.739292	0.000136312	0.0106605	0.109046	0.00165216	1.11328	0.0194511	5.01506e-05	0	0.0016705	1.99524	0.370527	6.83185e-05	0.00534295	0.0546531
Warren (2016)		670A-6R1-25-27	42.6991	0.0111	1.371	8.5077	0.1409	45.4495	1.3194	0.0117		0.1624		0.850835	0.0487805	0.114438	-0.0140534	1	0.112852	0.0481044	0.839044	1	0.539968	0.839044	1	0	0	0	1.26366	1	0	0	0	53.9572	0.710704	0.000138924	0.0134464	0.118409	0.00198619	1.12778	0.0235271	0.000188771	0	0.00106843	1.99725	0.355842	6.95575e-05	0.00673249	0.0592862
Warren (2016)		895D-5R2-90-95	43.0962	0.004383	0.476492	8.45756	0.114692	46.5616	0.786495	0.0006405		0.137409		0.850891	0.0217576	0.149477	-0.0221256	1	0.146242	0.0212866	0.832472	1	0.505208	0.832472	1	0	0	0	1.27666	1	0	0	0	55.0191	0.717313	5.48561e-05	0.00467332	0.117711	0.00161674	1.15537	0.0140245	1.0334e-05	0	0.000904017	2.01168	0.356574	2.72688e-05	0.00232309	0.0585139
Warren (2016)		ANTP-134-HD5	42.3282	0.00837	0.75801	7.85381	0.10618	47.8222	0.57908	0.0089		0.16653		0.900039	0.0156849	0.0952944	-0.0110186	1	0.0942558	0.0155139	0.89023	1	0.531889	0.89023	1	0	0	0	1.31534	1	0	0	0	55.676	0.704531	0.000104756	0.00743439	0.109308	0.00149676	1.18666	0.010326	0.000143595	0	0.00109561	2.0211	0.348589	5.18312e-05	0.00367839	0.0540837
Warren (2016)		895F-1R1-11-16	43.5396	0.005186	0.543749	8.30347	0.108811	46.2782	0.677937	7.8e-05		0.15168		0.823744	0.0122831	0.190274	-0.0263014	1	0.185398	0.0119683	0.802634	1	0.477221	0.802634	1	0	0	0	1.25361	1	0	0	0	54.5817	0.724694	6.49061e-05	0.00533296	0.115567	0.00153385	1.14834	0.0120887	1.25847e-06	0	0.000997907	2.00862	0.360791	3.23137e-05	0.00265503	0.0575353
Warren (2016)		IO11/76-56-50	43.9186	0.033534	1.94688	8.57557	0.132502	43.3717	1.35758	0.049626		0.221802		0.752933	0.0381381	0.2346	-0.0256711	1	0.228729	0.0371836	0.734088	1	0.466762	0.734088	1	0	0	0	1.18281	1	0	0	0	51.9472	0.731002	0.0004197	0.0190945	0.119354	0.0018678	1.07622	0.024208	0.000800678	0	0.00145924	1.97442	0.370235	0.000212568	0.00967092	0.0604499
Warren (2016)		EDUL-23-3-2	44.0662	0.04613	2.33147	8.80423	0.13704	42.3016	1.64732	0.05024		0.21645		0.727362	0.0510497	0.247942	-0.0263536	1	0.241576	0.0497389	0.708685	1			1	0	0	0	1.15975	1	0	0	0	51.1059	0.733458	0.000577347	0.0228665	0.122536	0.00193177	1.04967	0.0293745	0.000810584	0	0.00142403	1.96265	0.373709	0.000294167	0.0116509	0.0624342
Warren (2016)		Van7-86-27	46.0828	0.0513196	2.42694	7.98602	0.129733	39.8291	2.71525	0.0454435		0.333406		0.585072	0.0975951	0.367337	-0.0500039	1	0.349843	0.0929474	0.557209	1	0.429031	0.557209	1	0	0	0	1.03759	1	0	0	0	47.8151	0.767024	0.000642298	0.0238029	0.111148	0.00182878	0.988315	0.0484175	0.000733196	0	0.00219349	1.94411	0.394538	0.000330382	0.0122436	0.057172
Warren (2016)		AII32-8-12	42.6406	0.01018	0.308298	7.8749	0.139862	48.2186	0.36113	0		0.04143		0.893145	0.00444828	0.118592	-0.0161851	1	0.116703	0.00437743	0.878919	1	0.512499	0.878919	1	0	0	0	1.31549	1	0	0	0	56.0935	0.709731	0.000127409	0.00302372	0.109602	0.00197155	1.19649	0.00643955	0	0	0.000272569	2.02766	0.350025	6.28356e-05	0.00149123	0.0540534
Warren (2016)		Van7-85-42	44.1962	0.0353016	2.2751	8.34937	0.125256	42.4535	1.86349	0.0295097		0.252196		0.724076	0.0631191	0.240304	-0.0274996	1	0.233873	0.0614298	0.704697	1	0.47779	0.704697	1	0	0	0	1.14948	1	0	0	0	50.8028	0.735623	0.000441822	0.0223137	0.116206	0.00176566	1.05344	0.0332292	0.000476117	0	0.0016592	1.96515	0.374334	0.000224829	0.0113547	0.0591332
Warren (2016)		IO11/76-60-56	43.7647	0.013245	1.64918	8.47153	0.132483	43.5091	1.75384	0.044111		0.234186		0.767453	0.0630372	0.195463	-0.025953	1	0.190518	0.0614426	0.748039	1	0.502828	0.748039	1	0	0	0	1.18773	1	0	0	0	51.9807	0.728441	0.00016577	0.0161748	0.117906	0.00186754	1.07963	0.0312739	0.000711697	0	0.00154072	1.97771	0.368325	8.38189e-05	0.00817854	0.0596173
Warren (2016)		670A-6R1-19-22	42.7879	0.012	1.4158	8.5272	0.1303	45.2834	1.2371	0.0057		0.1683		0.84197	0.0431178	0.13009	-0.0151774	1	0.128145	0.0424731	0.829382	1	0.527888	0.829382	1	0	0	0	1.25761	1	0	0	0	53.8106	0.712182	0.000150188	0.0138858	0.118681	0.00183676	1.12366	0.0220596	9.19652e-05	0	0.00110725	1.99365	0.357225	7.5333e-05	0.00696503	0.0595293
Warren (2016)		PS59-246-01	44.2973	0.0272944	2.9146	8.1997	0.0678546	42.2033	1.52424	0.0345002		0.294178		0.706149	0.039876	0.27833	-0.024355	1	0.271712	0.0389279	0.68936	1	0.442952	0.68936	1	0	0	0	1.13783	1	0	0	0	50.403	0.737306	0.000341607	0.0285857	0.114122	0.000956507	1.04723	0.0271797	0.000556635	0	0.0019354	1.95821	0.37652	0.000174449	0.0145979	0.0582789
Warren (2016)		DMM-WH05	44.7191	0.130097	3.9827	8.1802	0.1283	38.7404	3.1765	0.1297		0.372197		0.620533	0.12854	0.278679	-0.0277515	1	0.271154	0.125069	0.603778	1	0.493008	0.603778	1	0	0	0	1.04923	1	0	0	0	46.9206	0.744326	0.00162825	0.0390614	0.113851	0.00180857	0.9613	0.0566423	0.00209261	0	0.00244869	1.92316	0.387033	0.000846653	0.0203111	0.0592001
Warren (2016)		670A-6R1-38-40	42.6158	0.0127	1.18	8.73681	0.147	45.8333	0.8985	0.0066		0.1276		0.858303	0.026966	0.129217	-0.0144866	1	0.127372	0.0265809	0.846047	1	0.519158	0.846047	1	0	0	0	1.28051	1	0	0	0	54.5701	0.709318	0.000158949	0.0115732	0.121598	0.00207217	1.1373	0.0160218	0.000106486	0	0.000839484	1.99899	0.354838	7.95145e-05	0.00578951	0.0608296
Warren (2016)		V3306-IN18-A	42.108	0.01462	0.67844	9.04078	0.15593	47.2062	0.25029	0.00595		0.09673		0.901869	-0.00151604	0.111017	-0.0113703	1	0.109769	-0.001499	0.89173	1	0.51311	0.89173	1	0	0	0	1.33578	1	0	0	0	56.247	0.700866	0.000182979	0.00665398	0.125829	0.00219805	1.17137	0.00446309	9.59987e-05	0	0.000636389	2.01229	0.348292	9.09304e-05	0.00330666	0.0625299
Warren (2016)		VULC5-35-30	43.6473	0.003108	1.55721	7.91125	0.135955	44.8916	1.2517	0.006707		0.14234		0.79215	0.0374641	0.192978	-0.0225921	1	0.188715	0.0366364	0.774649	1	0.489548	0.774649	1	0	0	0	1.20976	1	0	0	0	52.8029	0.726487	3.88986e-05	0.0152727	0.110108	0.00191648	1.11394	0.0223198	0.000108212	0	0.000936458	1.99112	0.364863	1.9536e-05	0.0076704	0.0552994
Warren (2016)		CIRCE-93-HD4	43.001	0.01564	1.29212	7.8713	0.13785	45.8994	1.06623	0.00871		0.25322		0.837391	0.0332807	0.146468	-0.0171396	1	0.144	0.0327199	0.82328	1	0.513103	0.82328	1	0	0	0	1.25045	1	0	0	0	53.7707	0.715729	0.000195745	0.0126728	0.109552	0.00194319	1.13894	0.0190127	0.000140529	0	0.00166594	1.99985	0.35789	9.78795e-05	0.00633687	0.0547799
Warren (2016)		EDUL-6B-1-3	44.6073	0.04355	1.73492	8.50168	0.12864	42.2388	1.95869	0.0617		0.26489		0.704326	0.0675647	0.264201	-0.0360918	1	0.254998	0.0652111	0.679791	1	0.467777	0.679791	1	0	0	0	1.13749	1	0	0	0	50.7405	0.742465	0.000545056	0.0170157	0.118325	0.00181336	1.04811	0.0349267	0.000995482	0	0.00174272	1.96594	0.377664	0.00027725	0.00865525	0.0601877
Warren (2016)		Naut-SP03-06	44.8832	0.0349402	1.9321	8.27969	0.12777	42.8422	1.15317	0.01494		0.27038		0.692773	0.01925	0.324255	-0.0362779	1	0.312904	0.0185761	0.66852	1	0.40742	0.66852	1	0	0	0	1.139	1	0	0	0	51.1219	0.747058	0.000437299	0.0189496	0.115236	0.0018011	1.06308	0.0205629	0.000241045	0	0.00177884	1.96915	0.379382	0.000222075	0.00962325	0.0585207
Warren (2016)		PS86-6-39	44.3155	0.0498997	1.84737	8.01742	0.118283	42.77	2.06897	0.120335		0.228692		0.72591	0.0759126	0.229471	-0.0312937	1	0.222508	0.0736091	0.703883	1	0.491384	0.703883	1	0	0	0	1.14604	1	0	0	0	50.7875	0.737608	0.000624527	0.0181186	0.111585	0.00166737	1.06129	0.0368933	0.00194151	0	0.00150457	1.97124	0.374186	0.00031682	0.00919149	0.0566069
Warren (2016)		1274A-18R1-112-113	43.3395	0.0071445	0.775544	8.13896	0.134735	46.206	0.731528	0.005411		0.177983		0.828491	0.015166	0.179729	-0.0233867	1	0.175622	0.0148194	0.809558	1	0.484511	0.809558	1	0	0	0	1.25394	1	0	0	0	54.345	0.721364	8.9418e-05	0.00760636	0.113277	0.00189928	1.14655	0.0130444	8.73024e-05	0	0.00117095	2.00509	0.359766	4.45955e-05	0.00379352	0.0564947
Warren (2016)		PS86-6-38	45.1142	0.0809994	3.07535	8.22574	0.123742	39.9429	2.54569	0.128732		0.272504		0.627668	0.0916449	0.316749	-0.0360618	1	0.305724	0.0884551	0.605821	1	0.45191	0.605821	1	0	0	0	1.06771	1	0	0	0	48.1687	0.750901	0.00101376	0.0301623	0.114485	0.00174432	0.99114	0.0453939	0.002077	0	0.00179281	1.93871	0.38732	0.000522904	0.0155579	0.0590521
Warren (2016)		S18-35-05	44.077	0.00048	0.96148	8.23675	0.1393	45.6869	0.21364	0		0.18796		0.780362	-0.0200356	0.269817	-0.0301436	1	0.261922	-0.0194494	0.757527	1	0.4149	0.757527	1	0	0	0	1.2234	1	0	0	0	53.9237	0.733638	6.00751e-06	0.00942997	0.114638	0.00196363	1.13367	0.00380956	0	0	0.00123659	1.99839	0.367114	3.00617e-06	0.00471878	0.0573652
Warren (2016)		670A-8R1-12-14	42.7419	0.0175	1.3837	8.57361	0.1539	44.7859	1.6284	0.0228		0.1955		0.837856	0.0646712	0.113627	-0.0161544	1	0.111821	0.0636431	0.824536	1	0.549535	0.824536	1	0	0	0	1.24841	1	0	0	0	53.3595	0.711416	0.000219024	0.013571	0.119326	0.00216944	1.11131	0.0290371	0.000367861	0	0.0012862	1.98871	0.357728	0.000110134	0.00682404	0.0600021
Warren (2016)		PS59-201-40	41.3462	0.00435442	0.521341	7.88457	0.129649	49.2712	0.238147	0.00603002		0.100858		0.963608	0.00616731	0.0321594	-0.0019345	1	0.0320973	0.0061554	0.961747	1	0.562373	0.961747	1	0	0	0	1.38237	0	1	0	0	57.1557	0.688186	5.44984e-05	0.00511319	0.109737	0.00182758	1.22261	0.00424656	9.72897e-05	0	0.000663546	2.03254	0.338585	2.6813e-05	0.00251567	0.05399
Warren (2016)		920D-5R2-76-82	41.3632	0.00888	1.53978	8.75341	0.13073	46.7236	0.82492	0.00202		0.14548		0.927341	0.0303894	0.0414251	0.000844125	1	0.0414601	0.0304151	0.928125	1	0.570973	0.928125	1	0	0	0	1.34122	0	1	0	0	55.477	0.688468	0.000111139	0.0151018	0.121829	0.00184282	1.15939	0.0147097	3.25912e-05	0	0.000957117	2.00245	0.343814	5.55016e-05	0.00754168	0.06084
Warren (2016)		895D-4R3-97-101	43.193	0.0055265	0.619025	8.40787	0.118111	46.0548	0.926507	0		0.162178		0.836368	0.0273196	0.15971	-0.0233978	1	0.156058	0.026695	0.817247	1	0.502662	0.817247	1	0	0	0	1.26091	1	0	0	0	54.4627	0.718925	6.91677e-05	0.00607125	0.11702	0.00166494	1.1428	0.0165212	0	0	0.00106698	2.00414	0.358721	3.45125e-05	0.00302936	0.0583891
Warren (2016)		VULC5-35-1	43.949	0.008019	1.2858	8.4148	0.135012	43.868	1.58477	0.030495		0.199296		0.764919	0.0539335	0.210947	-0.0297995	1	0.204842	0.0523729	0.742785	1	0.489322	0.742785	1	0	0	0	1.18962	1	0	0	0	52.2828	0.731508	0.000100363	0.0126108	0.117116	0.00190319	1.08854	0.0282591	0.000492014	0	0.00131117	1.98184	0.369106	5.06414e-05	0.0063632	0.0590947
Warren (2016)		VULC5-41-30	44.4491	0.042429	2.12658	8.17609	0.138586	42.6837	1.61324	0.028775		0.215081		0.712782	0.0476694	0.270456	-0.030907	1	0.262348	0.0462403	0.691412	1	0.452581	0.691412	1	0	0	0	1.14422	1	0	0	0	50.8597	0.739831	0.000531026	0.020857	0.113794	0.00195357	1.05915	0.0287668	0.000464263	0	0.00141502	1.96676	0.376168	0.00027	0.0106047	0.0578585
Warren (2016)		ANTP-126-HD2	43.8958	8e-05	1.60654	7.88804	0.11281	43.9493	1.77855	0.03977		0.20159		0.766603	0.0641959	0.195738	-0.0265372	1	0.190678	0.0625364	0.746785	1	0.503367	0.746785	1	0	0	0	1.18092	1	0	0	0	51.8373	0.730622	1.00125e-06	0.0157566	0.109785	0.00159022	1.09055	0.0317145	0.000641659	0	0.00132627	1.98199	0.368631	5.05175e-07	0.00794988	0.0553912
Warren (2016)		Kn180-14-66	43.4648	0.0136239	1.08293	8.49461	0.144519	45.218	0.84557	0.0137486		0.192536		0.805881	0.0179191	0.200733	-0.0245334	1	0.195927	0.01749	0.786583	1	0.47433	0.786583	1	0	0	0	1.23577	1	0	0	0	53.7126	0.723448	0.000170512	0.0106211	0.118227	0.0020372	1.12203	0.0150779	0.000221823	0	0.0012667	1.9931	0.362976	8.55512e-05	0.00532893	0.059318
Warren (2016)		920D-12R3-29-35	42.8108	0.00762	1.00779	8.56647	0.13126	46.2676	0.54704	0.00261		0.12627		0.852866	0.00742055	0.156725	-0.0170113	1	0.154103	0.00729643	0.8386	1	0.492591	0.8386	1	0	0	0	1.28084	1	0	0	0	54.834	0.712564	9.53692e-05	0.00988417	0.119227	0.0018503	1.14808	0.00975464	4.21104e-05	0	0.000830734	2.00233	0.355868	4.76292e-05	0.00493634	0.0595443
Warren (2016)		IO11/76-59-78	43.6385	0.024276	1.53475	8.21673	0.128726	44.7002	0.970884	0.018297		0.221983		0.785693	0.0211706	0.217025	-0.023888	1	0.211961	0.0206767	0.767362	1	0.466912	0.767362	1	0	0	0	1.21262	1	0	0	0	52.9169	0.72634	0.00030383	0.0150524	0.114359	0.00181458	1.10919	0.0173125	0.000295208	0	0.00146043	1.98612	0.365707	0.000152976	0.00757879	0.0575792
Warren (2016)		EDUL-64-1-5	44.8425	0.01484	1.86359	8.1148	0.12497	42.8012	1.38182	0.00725		0.2994		0.694748	0.032832	0.308997	-0.0365775	1	0.298094	0.0316734	0.670233	1	0.423533	0.670233	1	0	0	0	1.13544	1	0	0	0	50.916	0.74638	0.000185732	0.0182777	0.112941	0.00176163	1.06207	0.0246402	0.000116973	0	0.00196976	1.96834	0.379193	9.43599e-05	0.00928583	0.0573788
Warren (2016)		VULC5-35-37	44.0332	0.004735	1.45479	8.0561	0.158641	44.1388	1.36392	0.01252		0.219835		0.76043	0.040474	0.228126	-0.0290295	1	0.22169	0.0393322	0.738978	1	0.472066	0.738978	1	0	0	0	1.18535	1	0	0	0	52.1949	0.732909	5.92616e-05	0.0142682	0.112124	0.00223627	1.09526	0.024321	0.000202001	0	0.0014463	1.98282	0.369629	2.98875e-05	0.00719592	0.0565476
Warren (2016)		Naut-SP03-10	43.6246	0.0187471	1.42773	8.14359	0.094341	44.8254	1.08126	0.017078		0.206356		0.790328	0.0281788	0.205575	-0.0240819	1	0.200741	0.0275161	0.771743	1	0.477339	0.771743	1	0	0	0	1.2142	1	0	0	0	52.969	0.726108	0.000234632	0.0140028	0.113342	0.00132987	1.11229	0.0192807	0.00027554	0	0.00135762	1.98822	0.365205	0.000118011	0.00704288	0.0570064
Warren (2016)		VULC5-41-63	43.1305	0.030922	2.28917	8.80681	0.106427	43.5838	1.31354	0.030837		0.110371		0.792256	0.0395531	0.183741	-0.0155496	1	0.180927	0.0389475	0.780125	1	0.495378	0.780125	1	0	0	0	1.2147	1	0	0	0	52.3907	0.717885	0.000387009	0.0224516	0.122572	0.00150024	1.08148	0.0234227	0.000497531	0	0.000726134	1.97093	0.364237	0.000196359	0.0113914	0.0621901
Warren (2016)		AII20-17-77	44.6867	0.017158	1.38489	7.65465	0.08456	44.6819	0.795587	0.019785		0.072375		0.734758	0.00531737	0.294152	-0.0342271	1	0.284417	0.00514139	0.710442	1	0.416111	0.710442	1	0	0	0	1.17119	1	0	0	0	52.3365	0.743786	0.000214743	0.0135827	0.106537	0.00119199	1.10873	0.0141866	0.000319216	0	0.000476157	1.98903	0.373945	0.000107964	0.0068288	0.0535622
Warren (2016)		EDUL-56-3-8	44.1254	0.01896	1.86321	8.51615	0.15164	43.1963	1.29607	0.01497		0.21243		0.737343	0.0330869	0.258722	-0.0291518	1	0.251393	0.0321497	0.716457	1	0.45077	0.716457	1	0	0	0	1.17194	1	0	0	0	51.7125	0.734443	0.000237297	0.0182739	0.118527	0.00213758	1.07187	0.0231111	0.00024153	0	0.00139758	1.97024	0.372769	0.000120441	0.00927499	0.0601586
Warren (2016)		ANTP-126-D5	43.8096	0.00074	1.56793	8.16778	0.1558	44.2769	1.25327	0.01549		0.12385		0.772561	0.0354017	0.217896	-0.0258587	1	0.212403	0.0345093	0.753087	1	0.474643	0.753087	1	0	0	0	1.1971	1	0	0	0	52.4447	0.729189	9.26158e-06	0.0153779	0.113678	0.00219622	1.09868	0.0223479	0.000249919	0	0.000814812	1.98254	0.367804	4.67156e-06	0.00775664	0.0573395
Warren (2016)		ANTP-134-HD3	44.0187	0.01895	1.45666	7.57466	0.12766	44.5218	1.33378	0.03009		0.28176		0.763712	0.0391018	0.225637	-0.028451	1	0.219395	0.0380201	0.742585	1	0.472633	0.742585	1	0	0	0	1.18351	1	0	0	0	52.0965	0.732668	0.000237171	0.0142866	0.105423	0.00179955	1.10476	0.0237835	0.000485479	0	0.00185371	1.9853	0.369047	0.000119464	0.0071962	0.053102
Warren (2016)		CD57-D1-1B-1	43.746	0.03245	2.29859	8.72302	0.13598	42.8565	1.29696	0.0284		0.23335		0.746511	0.0332647	0.243562	-0.0233374	1	0.238008	0.0325061	0.729486	1	0.458704	0.729486	1	0	0	0	1.17907	1	0	0	0	51.5796	0.728129	0.000406133	0.022544	0.121406	0.00191683	1.06344	0.023127	0.000458212	0	0.00153522	1.96296	0.370934	0.000206898	0.0114847	0.0618485
Warren (2016)		V3306-IN18-B	43.8402	0.05706	2.06622	8.46814	0.13564	42.9407	1.6166	0.043		0.18194		0.747002	0.0521853	0.226317	-0.0255039	1	0.220688	0.0508875	0.728424	1	0.479316	0.728424	1	0	0	0	1.17264	1	0	0	0	51.4088	0.729697	0.000714143	0.020265	0.117859	0.00191204	1.06553	0.0288267	0.000693772	0	0.00119699	1.96669	0.371028	0.000363119	0.0103041	0.0599274
Warren (2016)		1274A-27R1-87-90	43.0784	0.008766	0.626732	8.14151	0.121526	46.525	0.675404	0.0154173		0.137699		0.844275	0.0145261	0.163141	-0.0219426	1	0.159639	0.0142142	0.826147	1	0.493389	0.826147	1	0	0	0	1.269	1	0	0	0	54.6665	0.717018	0.000109712	0.00614684	0.113313	0.00171308	1.15447	0.0120436	0.000248747	0	0.000905923	2.00596	0.357443	5.4693e-05	0.00306428	0.0564879
Warren (2016)		S18-35-04	44.5618	0.00672	1.49898	8.12259	0.12035	44.3946	0.34398	0.00588		0.26838		0.728997	-0.0211068	0.326224	-0.0341139	1	0.315462	-0.0204105	0.704949	1	0.383434	0.704949	1	0	0	0	1.17853	1	0	0	0	52.5172	0.741707	8.41051e-05	0.0147016	0.113049	0.0016965	1.1016	0.00613374	9.48693e-05	0	0.00176568	1.98084	0.374441	4.24594e-05	0.00742194	0.0570715
Warren (2016)		670A-2R1-20-23	42.9798	0.0119	1.0155	8.3033	0.1223	46.2736	0.4014	0.0198		0.1757		0.840169	-0.00219401	0.181182	-0.019157	1	0.177777	-0.00215277	0.824376	1	0.473468	0.824376	1	0	0	0	1.26983	1	0	0	0	54.5769	0.715376	0.000148936	0.00995979	0.115564	0.00172399	1.14823	0.00715763	0.000319458	0	0.00115593	1.99963	0.357753	7.44817e-05	0.0049808	0.0577928
Warren (2016)		V3306-IN19-C	44.2152	0.022275	2.30109	8.59183	0.111375	41.4701	2.38712	0.017345		0.170655		0.708545	0.0921524	0.229137	-0.029834	1	0.222499	0.0894827	0.688019	1	0.500553	0.688019	1	0	0	0	1.13223	1	0	0	0	50.0619	0.735939	0.000278786	0.0225686	0.11958	0.00156999	1.02903	0.0425663	0.000279848	0	0.00112274	1.95294	0.376836	0.000142752	0.0115562	0.0612308
Warren (2016)		ANTP-87-HD9	43.0194	2.4e-05	0.656682	7.97421	0.124814	46.8744	0.535834	0.006988		0.065492		0.850851	0.00759661	0.162081	-0.0205284	1	0.158821	0.0074438	0.833735	1	0.489953	0.833735	1	0	0	0	1.27497	1	0	0	0	54.8486	0.716035	3.00375e-07	0.00644058	0.110984	0.00175943	1.16314	0.00955481	0.000112746	0	0.000430874	2.00845	0.35651	1.49556e-07	0.00320674	0.0552585
Warren (2016)		395A-18R1-2f	43.0896	0.01597	0.8626	8.4138	0.13494	45.5425	0.96289	0.00871		0.21121		0.827758	0.0278015	0.16713	-0.0226896	1	0.163422	0.0271847	0.809393	1	0.498694	0.809393	1	0	0	0	1.25219	1	0	0	0	53.9563	0.717205	0.000199875	0.00846018	0.117102	0.00190217	1.13009	0.0171699	0.000140529	0	0.00138956	1.99366	0.359743	0.000100255	0.00424355	0.0587374
Warren (2016)		JR31-52-03	45.6447	0.0281906	2.57966	7.90866	0.132355	41.1537	1.42808	0.0359867		0.325021		0.613722	0.0244132	0.405412	-0.0435474	1	0.388495	0.0233944	0.588111	1	0.36656	0.588111	1	0	0	0	1.07487	1	0	0	0	49.0623	0.759733	0.000352824	0.0253007	0.110072	0.00186574	1.02118	0.0254651	0.000580618	0	0.00213832	1.94669	0.390269	0.000181243	0.0129968	0.0565431
Warren (2016)		IO11/76-58-34	43.9929	0.010445	2.02327	8.58379	0.103086	43.2903	0.950933	0.022464		0.254766		0.739386	0.0132326	0.274628	-0.0272471	1	0.267344	0.0128817	0.719774	1	0.430436	0.719774	1	0	0	0	1.17915	1	0	0	0	51.8741	0.732239	0.000130726	0.0198437	0.119468	0.00145314	1.0742	0.0169567	0.000362439	0	0.00167611	1.96633	0.372388	6.64821e-05	0.0100918	0.0607569
Warren (2016)		395A-18R2-17g	45.7351	0.02901	1.80045	7.54607	0.11999	42.8469	0.7639	0.00813		0.37905		0.640012	-0.00922229	0.415928	-0.0467173	1	0.397364	-0.00881068	0.611447	1	0.342845	0.611447	1	0	0	0	1.10184	1	0	0	0	50.393	0.761237	0.000363079	0.0176584	0.105025	0.00169143	1.0632	0.0136216	0.000131171	0	0.00249378	1.96542	0.387315	0.000184733	0.00898453	0.0534366
Warren (2016)		IO11/76-59-95	43.7569	0.01568	1.74721	8.1022	0.111152	43.7873	1.33718	0.0398		0.32652		0.761403	0.0386316	0.226022	-0.0260559	1	0.220282	0.0376506	0.742068	1	0.471908	0.742068	1	0	0	0	1.18586	1	0	0	0	51.8895	0.728311	0.000196245	0.0171362	0.112766	0.00156685	1.08653	0.0238441	0.000642143	0	0.00214818	1.97314	0.369112	9.94581e-05	0.00868474	0.0571502
Warren (2016)		JR31-52-08	45.1982	0.0352748	2.0522	8.09237	0.128616	41.5678	1.84417	0.0528086		0.252405		0.653746	0.0547238	0.333325	-0.0417955	1	0.319953	0.0525284	0.627519	1	0.422953	0.627519	1	0	0	0	1.09872	1	0	0	0	49.6602	0.752301	0.000441487	0.0201275	0.112629	0.00181302	1.03146	0.0328847	0.000852026	0	0.00166058	1.95417	0.384973	0.000225921	0.0102998	0.0576351
Warren (2016)		670A-7R1-25-27	43.1042	0.0193	1.4162	8.6004	0.1417	44.9394	0.7851	0.0099		0.1935		0.812841	0.0145756	0.192795	-0.0202109	1	0.188975	0.0142869	0.796738	1	0.476494	0.796738	1	0	0	0	1.2421	1	0	0	0	53.5398	0.717447	0.000241552	0.0138898	0.119699	0.00199746	1.11512	0.0139996	0.000159729	0	0.00127304	1.98383	0.361647	0.00012176	0.00700149	0.0603376
Warren (2016)		VULC5-41-29	43.2202	0.020934	1.60204	8.27121	0.154453	43.6151	2.01201	0.04714		0.231374		0.791454	0.0808874	0.149811	-0.0221522	1	0.146564	0.0791344	0.774302	1	0.53842	0.774302	1	0	0	0	1.20051	1	0	0	0	51.8863	0.719378	0.000262003	0.0157124	0.115118	0.00217723	1.08226	0.0358775	0.000760568	0	0.00152222	1.97307	0.364599	0.000132789	0.00796344	0.0583446
Warren (2016)		IO11/76-58-10	44.6383	0.022724	2.09421	8.1424	0.160508	41.8201	1.87867	0.065136		0.351914		0.683677	0.0602805	0.292193	-0.0361504	1	0.281999	0.0581773	0.659824	1	0.448127	0.659824	1	0	0	0	1.11927	1	0	0	0	49.9625	0.742982	0.000284406	0.0205395	0.113325	0.00226259	1.03772	0.0334999	0.00105092	0	0.00231525	1.95398	0.380241	0.000145552	0.0105116	0.057997
Warren (2016)		VULC5-35-36	43.7276	0.017114	1.45183	7.91566	0.152459	44.6399	1.06597	0.011434		0.186836		0.777243	0.0257971	0.223071	-0.0261115	1	0.217395	0.0251407	0.757464	1	0.466352	0.757464	1	0	0	0	1.20189	1	0	0	0	52.5556	0.727824	0.000214193	0.0142392	0.110169	0.00214913	1.10769	0.019008	0.000184479	0	0.0012292	1.98271	0.367086	0.00010803	0.00718171	0.055565
Warren (2016)		IO11/76-60-61	43.0741	0.026052	0.838201	8.25697	0.082267	45.9092	0.741066	0.035926		0.197682		0.831547	0.0160572	0.174649	-0.0222531	1	0.170847	0.0157077	0.813445	1	0.48778	0.813445	1	0	0	0	1.25751	1	0	0	0	54.1661	0.716945	0.000326058	0.00822088	0.11492	0.00115967	1.13918	0.0132144	0.000579639	0	0.00130055	1.99585	0.359218	0.000163368	0.00411899	0.0575792
Warren (2016)		ANTP-134-HD8	42.9482	0.0136	1.05376	7.67552	0.1198	45.7469	1.31892	0.032		0.23648		0.835234	0.0478288	0.136589	-0.0196514	1	0.133956	0.046907	0.819137	1	0.527092	0.819137	1	0	0	0	1.24388	1	0	0	0	53.4224	0.714851	0.000170213	0.010335	0.106827	0.00168875	1.13516	0.0235185	0.000516296	0	0.00155581	1.99462	0.358389	8.53359e-05	0.00518145	0.0535576
Warren (2016)		670A-5R2-139-142	43.1681	0.0136	1.3108	8.501	0.1438	45.2845	0.5403	0.0101		0.1673		0.813244	0.001244	0.206638	-0.0211262	1	0.202363	0.00121826	0.796419	1	0.461219	0.796419	1	0	0	0	1.24595	1	0	0	0	53.7855	0.71851	0.000170213	0.012856	0.118316	0.00202707	1.12368	0.00963445	0.000162956	0	0.00110067	1.98646	0.361703	8.56864e-05	0.00647182	0.0595611
Warren (2016)		670A-9R1-63-65	42.402	0.006	0.6675	8.7185	0.13	46.6585	0.384	0		0.1365		0.874459	0.00236877	0.139429	-0.0162563	1	0.137199	0.00233088	0.860471	1	0.499484	0.860471	1	0	0	0	1.306	1	0	0	0	55.377	0.705759	7.50939e-05	0.00654668	0.121343	0.00183253	1.15778	0.00684736	0	0	0.000898037	2.00108	0.352689	3.75267e-05	0.00327157	0.0606388
Warren (2016)		670A-5R1-8-11	42.3772	0.0131	1.2617	8.763	0.1327	45.4207	0.9769	0.0065		0.1437		0.857394	0.031223	0.125222	-0.0138399	1	0.123513	0.0307968	0.84569	1	0.523821	0.84569	1	0	0	0	1.27861	1	0	0	0	54.1837	0.705346	0.000163955	0.0123745	0.121962	0.00187059	1.12706	0.0174198	0.000104873	0	0.000945406	1.98725	0.354935	8.25033e-05	0.00622692	0.0613724
Warren (2016)		JR31-52-05	44.2291	0.026107	2.41113	8.18221	0.138584	42.3285	1.46948	0.0361273		0.26324		0.707772	0.0384801	0.28266	-0.028912	1	0.274717	0.0373988	0.687884	1	0.440334	0.687884	1	0	0	0	1.14202	1	0	0	0	50.5107	0.73617	0.000326745	0.0236478	0.113879	0.00195354	1.05033	0.0262033	0.000582887	0	0.00173186	1.95483	0.37659	0.000167148	0.0120971	0.0582553
Warren (2016)		PS86-6-40	44.0732	0.0681085	2.55691	8.39929	0.107075	41.4673	2.10795	0.103156		0.198689		0.705155	0.0753987	0.247298	-0.0278512	1	0.240597	0.0733556	0.686048	1	0.480794	0.686048	1	0	0	0	1.13145	1	0	0	0	49.8665	0.733576	0.000852422	0.0250776	0.1169	0.00150938	1.02896	0.0375883	0.00166435	0	0.00130718	1.94744	0.376687	0.000437714	0.0128772	0.0600277
Warren (2016)		AII107-61-78	44.5155	0.020518	2.29025	8.03261	0.131248	42.0264	1.81751	0.06035		0.170988		0.692511	0.0571638	0.283069	-0.0327438	1	0.274094	0.0553514	0.670555	1	0.451059	0.670555	1	0	0	0	1.12453	1	0	0	0	50.059	0.740937	0.000256796	0.0224623	0.111797	0.00185013	1.04284	0.0324092	0.000973701	0	0.00112493	1.95465	0.379064	0.000131377	0.0114917	0.0571954
Warren (2016)		895C-1R1-28-32	42.4035	0.0107663	0.601281	8.36857	0.105738	46.7436	0.675324	0		0.138609		0.87666	0.0187344	0.121068	-0.0164629	1	0.119107	0.018431	0.862462	1	0.519225	0.862462	1	0	0	0	1.29971	1	0	0	0	55.1121	0.705783	0.000134748	0.00589722	0.116473	0.00149053	1.15989	0.0120422	0	0	0.000911912	2.00262	0.35243	6.72856e-05	0.00294475	0.0581601
Warren (2016)		SDM-4-1-37	44.3737	0.01456	1.82017	7.88562	0.13009	43.9007	0.62255	0.00334		0.29218		0.724256	-0.00686574	0.31446	-0.0318497	1	0.304753	-0.00665381	0.701901	1	0.397559	0.701901	1	0	0	0	1.16705	1	0	0	0	51.7863	0.738576	0.000182228	0.0178518	0.109751	0.0018338	1.08935	0.0111011	5.38884e-05	0	0.00192226	1.97062	0.374794	9.24723e-05	0.00905898	0.0556937
Warren (2016)		920B-12R4-84-90	42.6791	0.01197	0.80003	8.45798	0.13625	45.0837	1.68862	0.00378		0.17119		0.843878	0.070224	0.106299	-0.020401	1	0.104174	0.06882	0.827006	1	0.556939	0.827006	1	0	0	0	1.25452	1	0	0	0	53.5417	0.710372	0.000149812	0.00784651	0.117717	0.00192064	1.1187	0.0301109	6.09874e-05	0	0.00112626	1.98801	0.357329	7.5358e-05	0.00394692	0.0592137
Warren (2016)		VULC5-35-47	43.5974	0.02305	1.56863	8.47867	0.12244	43.5139	1.52089	0.02944		0.17385		0.767894	0.0504492	0.208227	-0.0265705	1	0.202838	0.0491434	0.748019	1	0.488615	0.748019	1	0	0	0	1.19256	1	0	0	0	51.9925	0.725656	0.000288486	0.0153848	0.118005	0.00172597	1.07975	0.02712	0.000474992	0	0.00114376	1.96955	0.368438	0.000146473	0.00781132	0.0599149
Warren (2016)		Van7-96-25	43.7226	0.0542091	2.63174	8.83224	0.115841	41.6899	1.78472	0.0995196		0.0719348		0.725624	0.0587373	0.239205	-0.0235662	1	0.233697	0.0573849	0.708918	1	0.475556	0.708918	1	0	0	0	1.15551	1	0	0	0	50.5221	0.727739	0.000678462	0.0258115	0.122926	0.00163294	1.03449	0.0318246	0.00160567	0	0.000473261	1.94718	0.37374	0.000348433	0.0132558	0.0631303
Warren (2016)		IO11/76-56-10	43.4972	0.026952	1.82469	8.08492	0.219726	43.3329	1.77551	0.075422		0.137036		0.7664	0.0642823	0.193709	-0.0243913	1	0.189097	0.0627517	0.748151	1	0.504405	0.748151	1	0	0	0	1.18209	1	0	0	0	51.4178	0.723989	0.000337322	0.0178961	0.112525	0.00309735	1.07526	0.0316604	0.00121688	0	0.000901563	1.96688	0.36809	0.000171501	0.00909873	0.0572099
Warren (2016)		ANTP-126-HD5	44.0308	0	1.74586	7.88444	0.1454	43.1002	1.93245	0.02796		0.10688		0.740085	0.0701534	0.219518	-0.0297566	1	0.213174	0.0681262	0.718699	1	0.493607	0.718699	1	0	0	0	1.15793	1	0	0	0	50.9846	0.732869	0	0.017123	0.109735	0.00204962	1.06948	0.0344588	0.000451113	0	0.000703166	1.96687	0.372606	0	0.00870569	0.0557915
Warren (2016)		CD57-D2-2-2	45.0699	0.03995	2.39388	8.06923	0.12915	41.3191	1.57122	0.02535		0.32544		0.645075	0.0372976	0.357504	-0.0398767	1	0.343794	0.0358674	0.620338	1	0.399569	0.620338	1	0	0	0	1.09582	1	0	0	0	49.3883	0.750164	0.0005	0.0234786	0.112307	0.00182055	1.02529	0.0280175	0.000409003	0	0.00214108	1.94413	0.385862	0.000257185	0.0120767	0.0577671
Warren (2016)		AII107-40-6	43.2737	0.01121	0.8509	8.21879	0.12265	45.1689	1.12131	0.0017		0.16955		0.810686	0.0346579	0.180428	-0.0257713	1	0.175895	0.0337871	0.790318	1	0.495304	0.790318	1	0	0	0	1.23372	1	0	0	0	53.3876	0.720268	0.0001403	0.00834543	0.114388	0.00172893	1.12082	0.0199948	2.74282e-05	0	0.00111547	1.98682	0.362522	7.06154e-05	0.00420039	0.0575734
Warren (2016)		EDUL-56-3-11	43.683	0.01924	1.81156	8.5897	0.14838	43.0418	1.41948	0.01564		0.18484		0.751679	0.0423555	0.233023	-0.027058	1	0.226884	0.0412397	0.731876	1	0.470168	0.731876	1	0	0	0	1.18196	1	0	0	0	51.6315	0.72708	0.000240801	0.0177674	0.11955	0.00209163	1.06803	0.0253117	0.000252339	0	0.00121607	1.96154	0.370667	0.000122761	0.00905784	0.0609471
Warren (2016)		920D-22R5-3-9	45.5163	0.01475	1.87017	7.83278	0.14189	41.8602	1.28327	0.01084		0.32747		0.632977	0.0201842	0.39399	-0.0471512	1	0.37625	0.0192754	0.604475	1	0.371251	0.604475	1	0	0	0	1.09176	1	0	0	0	49.6929	0.757595	0.000184606	0.0183422	0.109016	0.00200014	1.03871	0.0228828	0.000174895	0	0.00215443	1.95106	0.388298	9.4618e-05	0.00940113	0.055875
Warren (2016)		895E-7R4-86-89	41.9943	0.004442	0.477424	8.66367	0.123956	47.0593	0.414515	4.2e-05		0.107016		0.897753	0.00761719	0.108476	-0.0138461	1	0.106995	0.00751316	0.885492	1	0.519915	0.885492	1	0	0	0	1.32692	1	0	0	0	55.723	0.698973	5.55945e-05	0.00468246	0.12058	0.00174734	1.16773	0.00739149	6.77638e-07	0	0.000704061	2.00186	0.349162	2.77714e-05	0.00233906	0.060234
Warren (2016)		1274A-1R1-88-90	43.7037	0.007222	0.728887	7.70977	0.13093	44.9247	1.38752	0.004159		0.207636		0.785212	0.0467371	0.199398	-0.0313471	1	0.193338	0.0453166	0.761346	1	0.49189	0.761346	1	0	0	0	1.20435	1	0	0	0	52.6345	0.727425	9.0388e-05	0.00714876	0.107304	0.00184564	1.11476	0.0247419	6.71023e-05	0	0.00136604	1.98475	0.366508	4.55413e-05	0.00360185	0.0540642
Warren (2016)		670A-8R1-6-8	43.2794	0.0213	1.6544	8.25571	0.1414	43.6428	1.5461	0.021		0.235		0.780214	0.0533113	0.190056	-0.0235812	1	0.185678	0.0520831	0.762239	1	0.500219	0.762239	1	0	0	0	1.19915	1	0	0	0	51.8985	0.720363	0.000266583	0.016226	0.114902	0.00199323	1.08295	0.0275695	0.000338819	0	0.00154607	1.96615	0.366382	0.000135586	0.00825265	0.05844
Warren (2016)		670A-9R-94-97	43.5966	0.0128	1.024	8.2219	0.1196	43.6261	1.9051	0.024		0.2543		0.771716	0.0739784	0.185266	-0.0309597	1	0.179702	0.0717569	0.748541	1	0.515028	0.748541	1	0	0	0	1.18927	1	0	0	0	51.848	0.725642	0.0001602	0.0100432	0.114431	0.00168593	1.08253	0.0339711	0.000387222	0	0.00167305	1.97053	0.368248	8.12981e-05	0.00509668	0.0580715
Warren (2016)		P6707B-AT196-AE	45.078	0.11187	3.19143	8.06244	0.1272	38.6232	3.13827	0.20036		0.24747		0.595241	0.125386	0.319497	-0.0401236	1	0.307172	0.120549	0.572279	1	0.469604	0.572279	1	0	0	0	1.03567	1	0	0	0	46.6857	0.750299	0.00140013	0.0313008	0.112212	0.00179306	0.958393	0.0559606	0.00323266	0	0.00162811	1.91622	0.391552	0.000730671	0.0163347	0.0585591
Warren (2016)		PS66-256-64	43.6249	0.0235975	2.04388	8.35683	0.137996	44.1798	0.209782	0		0.182712		0.759527	-0.0266872	0.290691	-0.0235314	1	0.284008	-0.0260737	0.742066	1	0.398324	0.742066	1	0	0	0	1.20428	1	0	0	0	52.5366	0.726113	0.000295337	0.0200459	0.116309	0.00194525	1.09627	0.00374077	0	0	0.00120207	1.96592	0.36935	0.000150228	0.0101967	0.0591627
Warren (2016)		V3306-IN19-AB	44.8859	0.03956	1.48557	8.80778	0.09576	42.6176	0.55492	0		0.26155		0.678351	-0.0152172	0.379795	-0.0429287	1	0.364162	-0.0145908	0.650429	1	0.358677	0.650429	1	0	0	0	1.14569	1	0	0	0	51.4254	0.747102	0.000495119	0.0145701	0.122586	0.00134987	1.05751	0.00989515	0	0	0.00172074	1.95523	0.382105	0.000253228	0.00745188	0.0626964
Warren (2016)		IO11/76-56-57	42.93	0.024412	2.58808	8.6528	0.102282	42.8849	1.24977	0.039034		0.212606		0.775918	0.0337123	0.205654	-0.0152849	1	0.202558	0.0332047	0.764237	1	0.479574	0.764237	1	0	0	0	1.20051	1	0	0	0	51.5377	0.714547	0.000305532	0.0253833	0.120429	0.00144181	1.06414	0.0222856	0.000629784	0	0.00139874	1.95056	0.366329	0.000156638	0.0130133	0.0617405
Warren (2016)		1274A-11R1-11-13	44.4839	0.008253	0.887013	7.87342	0.13194	44.1104	0.89502	0.003938		0.256823		0.726901	0.0118766	0.301327	-0.0401048	1	0.289708	0.0114187	0.698873	1	0.41668	0.698873	1	0	0	0	1.1686	1	0	0	0	51.9838	0.740411	0.000103292	0.00869962	0.109581	0.00185988	1.09455	0.0159597	6.35366e-05	0	0.00168965	1.97292	0.375287	5.23547e-05	0.00440952	0.0555428
Warren (2016)		HLY102-70-75	43.989	0.0291963	3.04501	7.54327	0.120439	41.7819	1.72083	0.0750721		0.305749		0.696809	0.0508156	0.276768	-0.0243932	1	0.270178	0.0496056	0.680217	1	0.450003	0.680217	1	0	0	0	1.12131	1	0	0	0	49.3252	0.732174	0.000365411	0.0298648	0.104986	0.00169776	1.03677	0.0306852	0.00121123	0	0.00201153	1.93977	0.377454	0.000188379	0.015396	0.0541231
Warren (2016)		HLY102-40-18	40.6896	0.00312262	0.929519	7.65186	0.118987	48.9106	0.192241	0.00517396		0.0731513		0.975368	0.00393658	0.0169328	0.00376308	1	0.0169968	0.00395145	0.979052	1	0.569819	0.979052	1	0	0	0	1.3901	0	1	0	0	56.5625	0.677256	3.90816e-05	0.00911651	0.106498	0.00167729	1.21366	0.00342797	8.34779e-05	0	0.000481264	2.01224	0.336568	1.94219e-05	0.00453052	0.0529249
Warren (2016)		920D-22R2-73-77	43.7038	0.0214	2.0334	7.73801	0.1286	42.858	1.7784	0.0072		0.2464		0.739809	0.061261	0.225883	-0.0269537	1	0.219955	0.0596531	0.720392	1	0.4848	0.720392	1	0	0	0	1.1577	1	0	0	0	50.596	0.727427	0.000267835	0.0199431	0.107697	0.0018128	1.06347	0.0317118	0.000116167	0	0.00162107	1.95407	0.372262	0.000137065	0.0102059	0.055114
Warren (2016)		Van7-85-27	44.1719	0.031228	1.67409	7.8589	0.147175	43.1646	1.17037	0.0273742		0.219741		0.71908	0.0246368	0.290304	-0.0340214	1	0.280753	0.0238262	0.695421	1	0.429014	0.695421	1	0	0	0	1.15511	1	0	0	0	51.0235	0.735218	0.000390839	0.0164191	0.109379	0.00207465	1.07108	0.0208696	0.000441662	0	0.00144568	1.95732	0.375625	0.000199681	0.00838857	0.0558821
Warren (2016)		670A-6R1-4-6	43.0928	0.0192	0.8572	8.2406	0.1327	44.4942	1.3355	0.022		0.1976		0.802011	0.0460287	0.179138	-0.0271772	1	0.174398	0.0448108	0.780791	1	0.502533	0.780791	1	0	0	0	1.22375	1	0	0	0	52.7348	0.717257	0.0002403	0.00840722	0.114692	0.00187059	1.10407	0.0238142	0.000354953	0	0.00130002	1.97201	0.363719	0.000121856	0.00426327	0.0581598
Warren (2016)		RC27-9-46-2	43.3048	0.0190138	1.2335	8.49556	0.141052	44.2626	0.69907	0.0137249		0.218852		0.780905	0.00664972	0.239829	-0.0273845	1	0.233437	0.00647247	0.760091	1	0.446312	0.760091	1	0	0	0	1.2183	1	0	0	0	52.7582	0.720785	0.00023797	0.0120979	0.11824	0.00198833	1.09833	0.0124656	0.000221441	0	0.00143983	1.96581	0.366662	0.000121055	0.00615418	0.0601485
[truncated: 25 more columns]
