# Supplementary material
Source: publisher site journal article supplement (https://www.degruyterbrill.com/publication/isbn/9781501520815/downloadAsset/9781501520815_Supplement%20Chapter%207.zip)
Supplement: Supplementary file 2 [file 7_EXOPLANETS_PUTIRKA_supp2.xlsx]

## Sheet: Simple 1 test modes



Example peridotites from: Warren, J.W. (2016) Global variation in abyssal peridotite compositions, Lithos, 248-251, 193-219.
Input - Elemental weight %																Output - Mineral Normative Abundances (weight %)																					Intermediate Calcs
Bulk Planet Weight % of Elements																Ca5(PO4)3(OH)	(Na,K)AlSi3O8	(Na,K)AlSiO4	Fm3Al2Si3O12	CaFmSi2O6	Fm2SiO4	FmSiO3	FmO	Al2O3	FeSiO3	SiO2	Fe	CaO			FeCr2O4	FeTiO3		TiO2			Bulk Planet Weight % of Elements
Rock/Star			Si	Ti	Cr	Al	Fe	Ni	Mg	Ca	Na	K	P	SUM		Apatite	Alk Feldspar	Nepheline	Prp + Alm	Di + Hd	Fo + Fa	En + Fs	Fe-Per	Cm	Fs	Qz	Fe Metal	CaO	TAO	P2O5	Chromite	Ilmenite	Cr2O3	Rutile	Total		Si	Ti	Cr	Al	Fe	Ni	Mg	Ca	Na	K	P	SUM
Sol (Earth)	Sol (Earth)		26.7457	0.102049	0.699428	1.77762	43.2272	2.44118	21.1206	2.29974	1.09725	0.124194	0.225442	99.8604		0.684883	8.98116	0	2.11414	6.38693	22.6021	33.3881	0	0	0	0	24.9802	0	0	0	0.711984	0.150456	0	0	100		26.7831	0.102192	0.700406	1.78011	43.2876	2.44459	21.1501	2.30295	1.09879	0.124367	0.225757	100
Warren (2016)	AII20-17-63		42.3696	0.13071	0.572699	8.24871	7.41937	0	30.186	9.99303	1.0691	0.0108331		100		0	6.68482	0	29.6013	28.5041	21.2352	13.3463	0	0	0	0	0	0	0	0	0.472176	0.156084	0	0	100		42.3696	0.13071	0.572699	8.24871	7.41937	0	30.186	9.99303	1.0691	0.0108331	0	100
Warren (2016)	AII20-17-96		37.3076	0.0907712	0.155452	4.74332	10.9049	0	42.5517	3.81482	0.425413	0.00598772		100		0	2.61393	0	17.6123	10.6683	64.341	4.5325	0	0	0	0	0	0	0	0	0.125656	0.106269	0	0	100		37.3076	0.0907712	0.155452	4.74332	10.9049	0	42.5517	3.81482	0.425413	0.00598772	0	100
Warren (2016)	920D-2R2-33-38		35.217	0.00672604	0.130306	0.979544	12.4958	0	50.7367	0.43144	0.00244442	0		100		0	0.0147063	0	4.0053	1.19115	88.55	6.12705	0	0	0	0	0	0	0	0	0.103986	0.007774	0	0	100		35.217	0.00672604	0.130306	0.979544	12.4958	0	50.7367	0.43144	0.00244442	0	0	100
Warren (2016)	920B-2R1-20-26		38.0539	0.00929062	0.303499	1.34968	10.9369	0	48.9388	0.404226	0.00378081	0		100		0	0.0226487	0	5.49307	1.11122	71.2202	21.901	0	0	0	0	0	0	0	0	0.241157	0.010692	0	0	100		38.0539	0.00929062	0.303499	1.34968	10.9369	0	48.9388	0.404226	0.00378081	0	0	100
Warren (2016)	920D-16R3-64-70		36.1123	0.0114804	0.219495	1.33498	11.5453	0	49.405	1.36247	0.00898324	0		100		0	0.0540671	0	5.43362	3.76308	81.8969	8.6638	0	0	0	0	0	0	0	0	0.17523	0.0132743	0	0	100		36.1123	0.0114804	0.219495	1.33498	11.5453	0	49.405	1.36247	0.00898324	0	0	100
Warren (2016)	920B-10R1-102-108		35.8252	0.00891235	0.175167	1.11726	12.0158	0	50.4953	0.358251	0.00416054	0		100		0	0.02498	0	4.55252	0.987067	84.8694	9.41627	0	0	0	0	0	0	0	0	0.139501	0.01028	0	0	100		35.8252	0.00891235	0.175167	1.11726	12.0158	0	50.4953	0.358251	0.00416054	0	0	100
Warren (2016)	RC27-9-6-8		37.3596	0.0419366	0.307716	2.15013	11.4972	0	46.262	2.33841	0.0429953	0		100		0	0.260751	0	8.67986	6.50793	70.2013	14.0538	0	0	0	0	0	0	6.93889e-18	0	0.247536	0.0488601	0	0	100		37.3596	0.0419366	0.307716	2.15013	11.4972	0	46.262	2.33841	0.0429953	0	0	100
Warren (2016)	920B-13R1-66-72		36.3001	0.00876352	0.219998	1.00345	11.6465	0	50.0384	0.779673	0.00318469	0		100		0	0.0191282	0	4.093	2.14901	82.2209	11.3326	0	0	0	0	0	0	4.33681e-19	0	0.175271	0.0101122	0	0	100		36.3001	0.00876352	0.219998	1.00345	11.6465	0	50.0384	0.779673	0.00318469	0	0	100
Warren (2016)	920D-14R4-76-82		37.6478	0.0147449	0.294689	1.31892	11.2323	0	48.0387	1.44298	0.00989639	0		100		0	0.059632	0	5.36954	3.99008	72.4201	17.908	0	0	0	0	0	0	0	0	0.235532	0.0170687	0	0	100		37.6478	0.0147449	0.294689	1.31892	11.2323	0	48.0387	1.44298	0.00989639	0	0	100
Warren (2016)	6K-643-01		36.7687	0.02408	0.268894	1.38776	11.4986	0	47.1562	2.86664	0.029149	0		100		0	0.176828	0	5.59705	7.98029	76.0767	9.92473	0	0	0	0	0	0	0	0	0.216368	0.0280636	0	0	100		36.7687	0.02408	0.268894	1.38776	11.4986	0	47.1562	2.86664	0.029149	0	0	100
Warren (2016)	EDUL-59-2-2		36.3608	0.0180276	0.275653	1.44008	12.279	0	48.1885	1.42319	0.0147818	0		100		0	0.0894915	0	5.87131	3.95398	78.6913	11.1515	0	0	0	0	0	0	0	0	0.221361	0.0209676	0	0	100		36.3608	0.0180276	0.275653	1.44008	12.279	0	48.1885	1.42319	0.0147818	0	0	100
Warren (2016)	CIRCE-93-HD7		36.1376	0.00375638	0.171341	0.487322	10.2914	0	52.4469	0.447533	0.0141497	0		100		0	0.0840348	0	1.90558	1.2197	87.3879	9.26352	0	0	0	0	0	0	0	0	0.134976	0.00428585	0	0	100		36.1376	0.00375638	0.171341	0.487322	10.2914	0	52.4469	0.447533	0.0141497	0	0	100
Warren (2016)	920D-14R3-7-12		36.7207	0.01457	0.228631	1.08765	11.7354	0	48.383	1.82097	0.00909805	0		100		0	0.0549782	0	4.43614	5.04966	78.1411	12.118	0	0	0	0	0	0	0	0	0.183257	0.0169145	0	0	100		36.7207	0.01457	0.228631	1.08765	11.7354	0	48.383	1.82097	0.00909805	0	0	100
Warren (2016)	EDUL-21-5-1		37.2473	0.0508504	0.328017	2.23887	11.4388	0	46.8816	1.76647	0.0480437	0		100		0	0.290536	0	8.99645	4.90215	71.2066	14.282	0	0	0	0	0	0	0	0	0.263113	0.0590765	0	0	100		37.2473	0.0508504	0.328017	2.23887	11.4388	0	46.8816	1.76647	0.0480437	0	0	100
Warren (2016)	EDUL-42-4-3		37.8663	0.039822	0.333915	1.98712	12.1294	0	46.2071	1.40834	0.0279773	0		100		0	0.169782	0	8.08411	3.92205	67.2108	20.2445	0	0	0	0	0.0535101	0	0	0	0.268786	0.0464267	0	0	100		37.8663	0.039822	0.333915	1.98712	12.1294	0	46.2071	1.40834	0.0279773	0	0	100
Warren (2016)	EDUL-21-5-2		38.0503	0.0669281	0.332379	1.98912	11.6691	0	44.883	2.93111	0.0780257	0		100		0	0.475548	0	7.88328	8.19797	65.5352	17.5609	0	0	0	0	0	0	0	0	0.268703	0.0783649	0	0	100		38.0503	0.0669281	0.332379	1.98912	11.6691	0	44.883	2.93111	0.0780257	0	0	100
Warren (2016)	920D-18R2-35-41		36.9751	0.0170379	0.31201	1.45278	11.7027	0	48.8498	0.686413	0.00408843	0		100		0	0.0246077	0	5.94066	1.89591	76.1495	15.7206	0	0	0	0	0	0	0	0	0.249096	0.019701	0	0	100		36.9751	0.0170379	0.31201	1.45278	11.7027	0	48.8498	0.686413	0.00408843	0	0	100
Warren (2016)	920D-22R6-111-117		36.874	0.0274112	0.254767	0.981807	11.2897	0	49.0465	1.51469	0.0111348	0		100		0	0.0670238	0	3.97476	4.18396	78.3319	13.2072	0	0	0	0	0	0	0	0	0.203411	0.031698	0	0	100		36.874	0.0274112	0.254767	0.981807	11.2897	0	49.0465	1.51469	0.0111348	0	0	100
Warren (2016)	920D-22R5-75-80		37.6708	0.00429936	0.339678	2.08351	11.1119	0	47.0322	1.75442	0.00319352	0		100		0	0.0192765	0	8.55718	4.85971	69.4076	16.8793	0	0	0	0	0	0	4.33681e-19	0	0.271964	0.00498563	0	0	100		37.6708	0.00429936	0.339678	2.08351	11.1119	0	47.0322	1.75442	0.00319352	0	0	100
Warren (2016)	AII60-9-73-HD2		37.0353	0.00142989	0.352734	1.27087	11.2685	0	48.1852	1.88336	0.00256297	0		100		0	0.0154667	0	5.21533	5.21561	75.7117	13.5579	0	0	0	0	0	0	0	0	0.282348	0.00165773	0	0	100		37.0353	0.00142989	0.352734	1.27087	11.2685	0	48.1852	1.88336	0.00256297	0	0	100
Warren (2016)	1274A-3R1-85-86		37.5353	0.00525311	0.255242	0.814259	11.1853	0	49.2169	0.986496	0.00125419	0		100		0	0.0075318	0	3.32714	2.71863	75.4651	18.2723	0	0	0	0	0	0	0	0	0.203316	0.00606052	0	0	100		37.5353	0.00525311	0.255242	0.814259	11.1853	0	49.2169	0.986496	0.00125419	0	0	100
Warren (2016)	920D-12R3-35-39		36.1815	0.0135948	0.180041	0.714802	11.9419	0	49.952	1.01282	0.00331042	0		100		0	0.0199276	0	2.91708	2.79785	83.4061	10.6996	0	0	0	0	0	0	0	0	0.143756	0.0157218	0	0	100		36.1815	0.0135948	0.180041	0.714802	11.9419	0	49.952	1.01282	0.00331042	0	0	100
Warren (2016)	RC27-9-18-45		36.3738	0.0235891	0.165747	1.2216	12.3714	0	49.0519	0.774092	0.0178886	0		100		0	0.107955	0	4.93884	2.14376	80.2605	12.3889	0	0	0	0	0	0	0	0	0.132677	0.0273486	0	0	100		36.3738	0.0235891	0.165747	1.2216	12.3714	0	49.0519	0.774092	0.0178886	0	0	100
Warren (2016)	920D-22R3-38-43		36.4637	0.00429097	0.214579	1.66058	11.1349	0	48.8855	1.63278	0.00371851	0		100		0	0.0223673	0	6.79078	4.50702	78.9463	9.55741	0	0	0	0	0	0	0	0	0.171205	0.00495858	0	0	100		36.4637	0.00429097	0.214579	1.66058	11.1349	0	48.8855	1.63278	0.00371851	0	0	100
Warren (2016)	920D-14R3-29-34		36.7556	0.0140631	0.245498	1.29903	11.2515	0	48.8372	1.59017	0.00691079	0		100		0	0.0416041	0	5.29743	4.3931	78.0626	11.993	0	0	0	0	0	0	0	0	0.196038	0.0162647	0	0	100		36.7556	0.0140631	0.245498	1.29903	11.2515	0	48.8372	1.59017	0.00691079	0	0	100
Warren (2016)	HLY102-40-56		34.9806	0.00089129	0.0898838	0.214236	10.7372	0	53.7705	0.203222	0.00345823	0		100		0	0.0205218	0	0.850168	0.553413	95.2573	3.24681	0	0	0	0	0	0	0	0	0.0707502	0.0010161	0	0	100		34.9806	0.00089129	0.0898838	0.214236	10.7372	0	53.7705	0.203222	0.00345823	0	0	100
Warren (2016)	920D-22R5-11-116		36.4982	0.00953007	0.215333	1.25355	11.5773	0	49.4311	1.01021	0.00480957	0		100		0	0.028921	0	5.11501	2.78763	80.052	11.8337	0	0	0	0	0	0	0	0	0.171752	0.0110093	0	0	100		36.4982	0.00953007	0.215333	1.25355	11.5773	0	49.4311	1.01021	0.00480957	0	0	100
Warren (2016)	670A-8R1-32-36		35.793	0.0140214	0.227051	1.73513	12.2104	0	48.9381	1.07663	0.00569776	0		100		0	0.0343968	0	7.11257	2.98263	81.8437	7.82861	0	0	0	0	0	0	8.67362e-19	0	0.181812	0.0162616	0	0	100		35.793	0.0140214	0.227051	1.73513	12.2104	0	48.9381	1.07663	0.00569776	0	0	100
Warren (2016)	920D-22R2-4-9		36.9169	0.0147114	0.268985	1.38817	11.0292	0	48.3631	2.01428	0.00465282	0		100		0	0.0280378	0	5.67958	5.57014	76.5436	11.9466	0	0	0	0	0	0	0	0	0.215001	0.017031	0	0	100		36.9169	0.0147114	0.268985	1.38817	11.0292	0	48.3631	2.01428	0.00465282	0	0	100
Warren (2016)	920D-15R5-14-22		35.2335	0.00891435	0.119984	0.937468	11.9014	0	50.8209	0.972406	0.00537235	0		100		0	0.0322741	0	3.81305	2.68074	88.931	4.43703	0	0	0	0	0	0	0	0	0.0956084	0.0102881	0	0	100		35.2335	0.00891435	0.119984	0.937468	11.9014	0	50.8209	0.972406	0.00537235	0	0	100
Warren (2016)	920D-22R4-104-109		36.8754	0.00591025	0.247338	1.37103	11.1867	0	49.0329	1.27866	0.00199549	0		100		0	0.0119942	0	5.60772	3.52693	77.4721	13.1772	0	0	0	0	0	0	0	0	0.197196	0.00682474	0	0	100		36.8754	0.00591025	0.247338	1.37103	11.1867	0	49.0329	1.27866	0.00199549	0	0	100
Warren (2016)	EDUL-3-1		37.4099	0.0159562	0.329756	1.47255	11.3556	0	47.6827	1.68197	0.0516547	0		100		0	0.311835	0	5.8101	4.6596	73.1452	15.7907	0	0	0	0	0	0	0	0	0.264053	0.0185055	0	0	100		37.4099	0.0159562	0.329756	1.47255	11.3556	0	47.6827	1.68197	0.0516547	0	0	100
Warren (2016)	920D-15R1-8-15		37.4442	0.0168951	0.334284	1.43397	11.5406	0	47.8876	1.33285	0.00964529	0		100		0	0.0582098	0	5.85242	3.69131	72.8118	17.2991	0	0	0	0	0	0	0	0	0.267597	0.0195884	0	0	100		37.4442	0.0168951	0.334284	1.43397	11.5406	0	47.8876	1.33285	0.00964529	0	0	100
Warren (2016)	S22-20-06		36.5139	0.0113257	0.228059	0.912258	11.7323	0	49.8693	0.725405	0.00736271	0		100		0	0.044249	0	3.70175	2.00061	81.1113	12.9472	0	0	0	0	0	0	0	0	0.181801	0.0130764	0	0	100		36.5139	0.0113257	0.228059	0.912258	11.7323	0	49.8693	0.725405	0.00736271	0	0	100
Warren (2016)	Naut-KN14-8		36.6052	0.0390888	0.265563	1.42402	11.1099	0	48.4728	2.03618	0.0472214	0		100		0	0.284632	0	5.62315	5.6322	78.4499	9.75252	0	0	0	0	0	0	6.93889e-18	0	0.212323	0.0452642	0	0	100		36.6052	0.0390888	0.265563	1.42402	11.1099	0	48.4728	2.03618	0.0472214	0	0	100
Warren (2016)	PS59-238-75		36.7145	0.0459131	0.275845	2.59843	11.0432	0	46.4694	2.78053	0.0720897	0		100		0	0.436489	0	10.3751	7.72582	73.2969	7.8907	0	0	0	0	0	0	0	0	0.221539	0.0534065	0	0	100		36.7145	0.0459131	0.275845	2.59843	11.0432	0	46.4694	2.78053	0.0720897	0	0	100
Warren (2016)	S22-20-04		37.0553	0.0086698	0.228624	1.27809	11.1817	0	49.5925	0.644787	0.0103326	0		100		0	0.0619323	0	5.17235	1.77354	77.4146	15.3858	0	0	0	0	0	0	0	0	0.181767	0.00998331	0	0	100		37.0553	0.0086698	0.228624	1.27809	11.1817	0	49.5925	0.644787	0.0103326	0	0	100
Warren (2016)	CIRCE-93-HD3		36.6488	0.0231547	0.162175	0.796479	10.2473	0	51.5653	0.551113	0.00566092	0		100		0	0.0336656	0	3.20179	1.50403	83.0686	12.0376	0	0	0	0	0	0	0	0	0.127928	0.0264542	0	0	100		36.6488	0.0231547	0.162175	0.796479	10.2473	0	51.5653	0.551113	0.00566092	0	0	100
Warren (2016)	Naut-KN15-3		35.9801	0.0320468	0.211647	1.56622	11.9101	0	48.174	2.09655	0.0293602	0		100		0	0.177731	0	6.32049	5.82406	80.8013	6.66915	0	0	0	0	0	0	0	0	0.169941	0.0372688	0	0	100		35.9801	0.0320468	0.211647	1.56622	11.9101	0	48.174	2.09655	0.0293602	0	0	100
Warren (2016)	Naut-SP03-12		36.6234	0.0315596	0.282967	1.18359	11.2885	0	48.7384	1.82237	0.0292698	0		100		0	0.176431	0	4.72196	5.0409	78.933	10.8649	0	0	0	0	0	0	0	0	0.226242	0.0365463	0	0	100		36.6234	0.0315596	0.282967	1.18359	11.2885	0	48.7384	1.82237	0.0292698	0	0	100
Warren (2016)	EDUL-24-1		37.0139	0.0736862	0.26384	2.33675	12.7021	0	45.4911	2.029	0.0896	0		100		0	0.546654	0	9.28061	5.68072	69.35	14.4098	0	0	0	0	0.432343	0	0	0	0.213515	0.086367	0	0	100		37.0139	0.0736862	0.26384	2.33675	12.7021	0	45.4911	2.029	0.0896	0	0	100
Warren (2016)	895D-7R2-129-133		35.8044	0.00358508	0.143568	0.39662	11.6439	0	51.1272	0.880323	0.000369302	0		100		0	0.00221483	0	1.61963	2.4228	87.5073	8.32972	0	0	0	0	0	0	0	0	0.114209	0.00413061	0	0	100		35.8044	0.00358508	0.143568	0.39662	11.6439	0	51.1272	0.880323	0.000369302	0	0	100
Warren (2016)	895D-3R1-38-43		36.303	0.00908078	0.191263	0.644963	11.4288	0	50.8219	0.591542	0.00948336	0		100		0	0.0568002	0	2.58773	1.62589	84.025	11.5421	0	0	0	0	0	0	0	0	0.151951	0.0104488	0	0	100		36.303	0.00908078	0.191263	0.644963	11.4288	0	50.8219	0.591542	0.00948336	0	0	100
Warren (2016)	Van7-85-47		36.8303	0.0391173	0.2996	2.26985	11.972	0	46.3266	2.21968	0.0427941	0		100		0	0.259997	0	9.19223	6.1886	72.6035	11.4686	0	0	0	0	0	0	0	0	0.241441	0.0456573	0	0	100		36.8303	0.0391173	0.2996	2.26985	11.972	0	46.3266	2.21968	0.0427941	0	0	100
Warren (2016)	Kn180-14-37		35.9664	0.0118478	0.205924	0.875976	11.4897	0	49.7113	1.66614	0.0727991	0		100		0	0.438214	0	3.24369	4.60246	84.634	6.90348	0	0	0	0	0	0	0	0	0.164419	0.0137011	0	0	100		35.9664	0.0118478	0.205924	0.875976	11.4897	0	49.7113	1.66614	0.0727991	0	0	100
Warren (2016)	PS86-6-26		38.537	0.0833701	0.293094	2.73476	10.7998	0	43.6104	3.79352	0.148087	0		100		0	0.902255	0	10.6358	10.6065	60.928	16.593	0	0	0	0	0	0	0	0	0.236866	0.097584	0	0	100		38.537	0.0833701	0.293094	2.73476	10.7998	0	43.6104	3.79352	0.148087	0	0	100
Warren (2016)	670A-6R1-54-56		36.0044	0.0177094	0.216528	1.30028	12.073	0	48.8568	1.51778	0.013553	0		100		0	0.0818901	0	5.28986	4.20845	81.8095	8.4162	0	0	0	0	0	0	0	0	0.173538	0.0205569	0	0	100		36.0044	0.0177094	0.216528	1.30028	12.073	0	48.8568	1.51778	0.013553	0	0	100
Warren (2016)	1274A-8R1-40-43		38.0107	0.0112926	0.340592	0.94829	11.092	0	48.3286	1.26095	0.00753498	0		100		0	0.0453431	0	3.85353	3.48213	71.6005	20.7336	0	0	0	0	0	0	0	0	0.271861	0.0130551	0	0	100		38.0107	0.0112926	0.340592	0.94829	11.092	0	48.3286	1.26095	0.00753498	0	0	100
Warren (2016)	V3306-IN19-M		36.7943	0.0276074	0.2985	1.88834	13.0708	0	46.5031	1.41417	0.00323031	0		100		0	0.019684	0	7.82768	3.95445	71.5735	15.8462	0	0	0	0	0.504812	0	0	0	0.241266	0.0323185	0	0	100		36.7943	0.0276074	0.2985	1.88834	13.0708	0	46.5031	1.41417	0.00323031	0	0	100
Warren (2016)	EDUL-21-7-2		37.6479	0.0408382	0.27899	1.5019	11.8167	0	47.5284	1.15604	0.0292466	0		100		0	0.17671	0	6.04426	3.20536	71.321	18.9817	0	0	0	0	0	0	0	0	0.223593	0.0474034	0	0	100		37.6479	0.0408382	0.27899	1.5019	11.8167	0	47.5284	1.15604	0.0292466	0	0	100
Warren (2016)	6K-643-06		37.2323	0.0217317	0.249074	0.969955	11.2705	0	49.0935	1.13799	0.0250209	0		100		0	0.150406	0	3.85406	3.13918	76.6856	15.947	0	0	0	0	0	0	3.46945e-18	0	0.198598	0.0250964	0	0	100		37.2323	0.0217317	0.249074	0.969955	11.2705	0	49.0935	1.13799	0.0250209	0	0	100
Warren (2016)	895C-3R1-35-39		35.9297	0.0126776	0.155969	0.561997	12.2278	0	50.2842	0.827533	5.49244e-05	0		100		0	0.000330725	0	2.30645	2.28668	85.338	9.92932	0	0	0	0	0	0	0	0	0.124573	0.0146655	0	0	100		35.9297	0.0126776	0.155969	0.561997	12.2278	0	50.2842	0.827533	5.49244e-05	0	0	100
Warren (2016)	1274A-1R1-27-31		36.5609	0.0065911	0.188574	0.773128	11.4746	0	50.3914	0.60294	0.0019309	0		100		0	0.011575	0	3.14987	1.65864	81.8896	13.1328	0	0	0	0	0	0	0	0	0.149943	0.00759058	0	0	100		36.5609	0.0065911	0.188574	0.773128	11.4746	0	50.3914	0.60294	0.0019309	0	0	100
Warren (2016)	AII32-8-6		36.3178	0.011198	0.04755	0.422052	11.0603	0	51.5993	0.539474	0.0022936	0		100		0	0.0136872	0	1.70585	1.47736	85.6905	11.0621	0	0	0	0	0	0	0	0	0.0376385	0.0128379	0	0	100		36.3178	0.011198	0.04755	0.422052	11.0603	0	51.5993	0.539474	0.0022936	0	0	100
Warren (2016)	AII20-17-29		35.2644	0.0149084	0.0498965	0.81807	12.5756	0	50.6122	0.657667	0.00730615	0		100		0	0.0439986	0	3.32293	1.8175	88.7608	5.99765	0	0	0	0	0	0	0	0	0.0398569	0.017248	0	0	100		35.2644	0.0149084	0.0498965	0.81807	12.5756	0	50.6122	0.657667	0.00730615	0	0	100
Warren (2016)	Kn180-Jas112-84		37.2151	0.0199186	0.308648	1.32172	11.427	0	47.8673	1.82871	0.011657	0		100		0	0.0704123	0	5.38568	5.06902	74.3845	14.82	0	0	0	0	0	0	1.73472e-18	0	0.247292	0.0231141	0	0	100		37.2151	0.0199186	0.308648	1.32172	11.427	0	47.8673	1.82871	0.011657	0	0	100
Warren (2016)	PS59-235-17		37.5798	0.0478796	0.258313	2.58691	11.0725	0	45.9839	2.37667	0.0940358	0		100		0	0.56913	0	10.217	6.60092	68.4788	13.8712	0	0	0	0	0	0	0	0	0.207371	0.0556706	0	0	100		37.5798	0.0478796	0.258313	2.58691	11.0725	0	45.9839	2.37667	0.0940358	0	0	100
Warren (2016)	1274A-18R1-13-16		37.2186	0.0118558	0.277787	1.08579	10.938	0	49.1961	1.2577	0.0141599	0		100		0	0.0850021	0	4.37494	3.46469	76.602	15.2385	0	0	0	0	0	0	0	0	0.221189	0.0136728	0	0	100		37.2186	0.0118558	0.277787	1.08579	10.938	0	49.1961	1.2577	0.0141599	0	0	100
Warren (2016)	PS59-235-01		35.5585	0.0299913	0.195354	1.86074	11.775	0	48.6674	1.83749	0.0755506	0		100		0	0.456203	0	7.29389	5.09169	83.3203	3.64666	0	0	0	0	0	0	0	0	0.156468	0.0347914	0	0	100		35.5585	0.0299913	0.195354	1.86074	11.775	0	48.6674	1.83749	0.0755506	0	0	100
Warren (2016)	Naut-KN14-6		37.3286	0.0304048	0.243143	1.12236	11.7932	0	48.0642	1.3963	0.0217378	0		100		0	0.131307	0	4.5162	3.8705	74.5156	16.7363	0	0	0	0	0	0	0	0	0.194813	0.0352834	0	0	100		37.3286	0.0304048	0.243143	1.12236	11.7932	0	48.0642	1.3963	0.0217378	0	0	100
Warren (2016)	895D-3R1-116-120		35.6511	0.00722098	0.153825	0.486811	11.8118	0	51.1501	0.739009	4.38926e-05	0		100		0	0.000263342	0	1.99068	2.03468	88.0104	7.8332	0	0	0	0	0	0	0	0	0.122417	0.00832306	0	0	100		35.6511	0.00722098	0.153825	0.486811	11.8118	0	51.1501	0.739009	4.38926e-05	0	0	100
Warren (2016)	VULC5-41-55		36.5409	0.0311967	0.205751	1.49062	11.7712	0	48.1118	1.80365	0.0448402	0		100		0	0.271034	0	5.92476	5.00295	78.161	10.4391	0	0	0	0	0	0	0	0	0.164962	0.0362262	0	0	100		36.5409	0.0311967	0.205751	1.49062	11.7712	0	48.1118	1.80365	0.0448402	0	0	100
Warren (2016)	1274A-1R1-65-66		37.4461	0.0117713	0.313319	1.03755	10.9839	0	48.7971	1.40608	0.00415898	0		100		0	0.0250032	0	4.23181	3.87915	74.9207	16.6798	0	0	0	0	0	0	0	0	0.24985	0.0135954	0	0	100		37.4461	0.0117713	0.313319	1.03755	10.9839	0	48.7971	1.40608	0.00415898	0	0	100
Warren (2016)	670A-6R1-25-27		35.7852	0.0119259	0.19921	1.30096	11.8565	0	49.14	1.69067	0.0155621	0		100		0	0.0939268	0	5.27716	4.6827	83.422	6.35089	0	0	0	0	0	0	0	0	0.159484	0.0138283	0	0	100		35.7852	0.0119259	0.19921	1.30096	11.8565	0	49.14	1.69067	0.0155621	0	0	100
Warren (2016)	895D-5R2-90-95		36.161	0.00471473	0.168756	0.452687	11.8006	0	50.4024	1.00901	0.000852941	0		100		0	0.00512739	0	1.85085	2.78349	84.6693	10.5512	0	0	0	0	0	0	0	0	0.134561	0.00544492	0	0	100		36.161	0.00471473	0.168756	0.452687	11.8006	0	50.4024	1.00901	0.000852941	0	0	100
Warren (2016)	ANTP-134-HD5		35.5414	0.00900976	0.204662	0.720643	10.9659	0	51.8031	0.74343	0.0118602	0		100		0	0.0708039	0	2.87588	2.03667	88.9524	5.89189	0	0	0	0	0	0	0	0	0.162064	0.0103332	0	0	100		35.5414	0.00900976	0.204662	0.720643	10.9659	0	51.8031	0.74343	0.0118602	0	0	100
Warren (2016)	895F-1R1-11-16		36.609	0.00559009	0.186669	0.517657	11.6097	0	50.1998	0.871544	0.000104087	0		100		0	0.000625105	0	2.11863	2.40195	81.9842	13.3394	0	0	0	0	0	0	0	0	0.148701	0.00644961	0	0	100		36.609	0.00559009	0.186669	0.517657	11.6097	0	50.1998	0.871544	0.000104087	0	0	100
Warren (2016)	IO11/76-56-50		36.9503	0.0361691	0.273134	1.85459	11.9975	0	47.0757	1.74636	0.0662639	0		100		0	0.401601	0	7.3404	4.857	73.9783	13.161	0	0	0	0	0	0	0	0	0.219572	0.0421127	0	0	100		36.9503	0.0361691	0.273134	1.85459	11.9975	0	47.0757	1.74636	0.0662639	0	0	100
Warren (2016)	EDUL-23-3-2		37.0635	0.0497402	0.266465	2.2203	12.3137	0	45.9008	2.11844	0.0670639	0		100		0	0.408227	0	8.886	5.9176	70.5567	13.7605	0	0	0	0	0.197604	0	0	0	0.215147	0.0581671	0	0	100		37.0635	0.0497402	0.266465	2.2203	12.3137	0	45.9008	2.11844	0.0670639	0	0	100
Warren (2016)	Van7-86-27		38.9637	0.0556273	0.412606	2.32339	11.2282	0	43.4454	3.51017	0.0609805	0		100		0	0.372404	0	9.37378	9.83716	58.2636	21.7536	0	0	0	0	0	0	0	0	0.334228	0.0652633	0	0	100		38.9637	0.0556273	0.412606	2.32339	11.2282	0	43.4454	3.51017	0.0609805	0	0	100
Warren (2016)	AII32-8-12		35.8574	0.0109746	0.0509931	0.29354	11.0118	0	52.3109	0.464319	0	0		100		0	0	0	1.1923	1.26968	89.0664	8.4188	0	0	0	0	0	0	0	0	0.0403048	0.0125633	0	0	100		35.8574	0.0109746	0.0509931	0.29354	11.0118	0	52.3109	0.464319	0	0	0	100
Warren (2016)	Van7-85-42		37.2224	0.0381151	0.310884	2.16951	11.6931	0	46.1269	2.39963	0.0394442	0		100		0	0.239539	0	8.78911	6.68737	70.6275	13.3616	0	0	0	0	0	0	0	0	0.250424	0.044468	0	0	100		37.2224	0.0381151	0.310884	2.16951	11.6931	0	46.1269	2.39963	0.0394442	0	0	100
Warren (2016)	IO11/76-60-56		36.789	0.0142735	0.288135	1.56965	11.8417	0	47.1842	2.25414	0.058849	0		100		0	0.356906	0	6.20344	6.27355	75.6541	11.2635	0	0	0	0	0	0	0	0	0.23179	0.0166304	0	0	100		36.789	0.0142735	0.288135	1.56965	11.8417	0	47.1842	2.25414	0.058849	0	0	100
Warren (2016)	670A-6R1-19-22		35.9101	0.012911	0.206738	1.34536	11.9004	0	49.0295	1.58744	0.00759223	0		100		0	0.0458291	0	5.49898	4.39731	82.4392	7.43813	0	0	0	0	0	0	0	0	0.16553	0.0149724	0	0	100		35.9101	0.012911	0.206738	1.34536	11.9004	0	49.0295	1.58744	0.00759223	0	0	100
Warren (2016)	PS59-246-01		37.3724	0.029521	0.363266	2.78416	11.5035	0	45.9348	1.96618	0.0461949	0		100		0	0.279978	0	11.2782	5.46853	68.2383	14.4086	0	0	0	0	0	0	6.93889e-18	0	0.292038	0.0343731	0	0	100		37.3724	0.029521	0.363266	2.78416	11.5035	0	45.9348	1.96618	0.0461949	0	0	100
Warren (2016)	DMM-WH05		37.7109	0.140645	0.459396	3.8027	11.4709	0	42.1463	4.09562	0.173585	0		100		0	1.06507	0	15.0522	11.5319	59.9943	11.6652	0	0	0	0	0.151669	0	0	0	0.373884	0.165786	0	0	100		37.7109	0.140645	0.459396	3.8027	11.4709	0	42.1463	4.09562	0.173585	0	0	100
Warren (2016)	670A-6R1-38-40		35.7525	0.0136591	0.156685	1.12088	12.1884	0	49.6066	1.15253	0.00878776	0		100		0	0.0529983	0	4.56547	3.18972	84.3857	7.66493	0	0	0	0	0	0	0	0	0.125342	0.0158257	0	0	100		35.7525	0.0136591	0.156685	1.12088	12.1884	0	49.6066	1.15253	0.00878776	0	0	100
Warren (2016)	V3306-IN18-A		35.2773	0.0157023	0.118613	0.643552	12.5949	0	51.0214	0.320606	0.00791127	0		100		0	0.0475883	0	2.60066	0.884999	89.2993	7.05472	0	0	0	0	0	0	0	0	0.0946392	0.0181457	0	0	100		35.2773	0.0157023	0.118613	0.643552	12.5949	0	51.0214	0.320606	0.00791127	0	0	100
Warren (2016)	VULC5-35-30		36.7968	0.00335906	0.175639	1.48641	11.0906	0	48.8247	1.61342	0.00897386	0		100		0	0.0539626	0	6.04953	4.45224	77.715	11.5853	0	0	0	0	0	0	0	0	0.140094	0.0038805	0	0	100		36.7968	0.00335906	0.175639	1.48641	11.0906	0	48.8247	1.61342	0.00897386	0	0	100
Warren (2016)	CIRCE-93-HD4		36.1954	0.016877	0.311971	1.23146	11.0174	0	49.843	1.37222	0.0116357	0		100		0	0.0698391	0	4.98242	3.77961	82.1024	8.79793	0	0	0	0	0	0	0	0	0.248373	0.0194607	0	0	100		36.1954	0.016877	0.311971	1.23146	11.0174	0	49.843	1.37222	0.0116357	0	0	100
Warren (2016)	EDUL-6B-1-3		37.5681	0.0470203	0.326528	1.65437	11.9063	0	45.8931	2.52218	0.0824702	0		100		0	0.501835	0	6.4606	7.043	69.9487	15.7274	0	0	0	0	0	0	0	0	0.263553	0.0549676	0	0	100		37.5681	0.0470203	0.326528	1.65437	11.9063	0	45.8931	2.52218	0.0824702	0	0	100
Warren (2016)	Naut-SP03-06		37.9284	0.037852	0.334423	1.84863	11.6346	0	46.7061	1.48994	0.0200368	0		100		0	0.121243	0	7.52794	4.13729	68.0527	19.8484	0	0	0	0	0	0	0	0	0.268416	0.0440022	0	0	100		37.9284	0.037852	0.334423	1.84863	11.6346	0	46.7061	1.48994	0.0200368	0	0	100
Warren (2016)	PS86-6-39		37.3436	0.0539066	0.282067	1.76261	11.2345	0	46.4967	2.66571	0.160935	0		100		0	0.975174	0	6.50009	7.41246	72.5715	12.2513	0	0	0	0	0	0	0	0	0.226709	0.0627526	0	0	100		37.3436	0.0539066	0.282067	1.76261	11.2345	0	46.4967	2.66571	0.160935	0	0	100
Warren (2016)	1274A-18R1-112-113		36.4938	0.00771241	0.219359	0.739405	11.3962	0	50.1944	0.941809	0.00723121	0		100		0	0.0433941	0	2.98982	2.59358	82.1178	12.0719	0	0	0	0	0	0	0	0	0.174606	0.00889134	0	0	100		36.4938	0.00771241	0.219359	0.739405	11.3962	0	50.1944	0.941809	0.00723121	0	0	100
Warren (2016)	PS86-6-38		38.1019	0.0876998	0.336859	2.94082	11.5523	0	43.5207	3.28728	0.172552	0		100		0	1.05388	0	11.4002	9.21352	62.1292	15.7478	0	0	0	0	0.0796231	0	2.77556e-17	0	0.2729	0.102903	0	0	100		38.1019	0.0876998	0.336859	2.94082	11.5523	0	43.5207	3.28728	0.172552	0	0	100
Warren (2016)	S18-35-05		37.2256	0.000519702	0.232346	0.919413	11.5676	0	49.7787	0.275873	0	0		100		0	0	0	3.75894	0.759318	77.3082	17.9881	0	0	0	0	0	0	0	0	0.184849	0.000598837	0	0	100		37.2256	0.000519702	0.232346	0.919413	11.5676	0	49.7787	0.275873	0	0	0	100
Warren (2016)	670A-8R1-12-14		35.8639	0.0188246	0.2401	1.31458	11.9626	0	48.4805	2.08911	0.0303625	0		100		0	0.183787	0	5.27699	5.80305	82.2691	6.25239	0	0	0	0	0	0	0	0	0.192776	0.0218907	0	0	100		35.8639	0.0188246	0.2401	1.31458	11.9626	0	48.4805	2.08911	0.0303625	0	0	100
Warren (2016)	PS59-201-40		34.7042	0.00468555	0.123907	0.49546	11.0048	0	53.3533	0.305625	0.00803273	0		100		0	0.0477761	0	1.97047	0.834167	95.4909	1.55354	0	0	0	0	0	0	0	0	0.0977525	0.00535384	0	0	100		34.7042	0.00468555	0.123907	0.49546	11.0048	0	53.3533	0.305625	0.00803273	0	0	100
Warren (2016)	920D-5R2-76-82		34.6341	0.00953205	0.178293	1.45979	12.1878	0	50.4717	1.05609	0.00268435	0		100		0	0.0161623	0	5.97823	2.91797	90.2325	0.701685	0	0	0	0	0	0	0	0	0.142391	0.0110257	0	0	100		34.6341	0.00953205	0.178293	1.45979	12.1878	0	50.4717	1.05609	0.00268435	0	0	100
Warren (2016)	895D-4R3-97-101		36.3115	0.00595614	0.199556	0.589223	11.7537	0	49.9491	1.1909	0	0		100		0	0	0	2.41707	3.28886	83.0398	11.0881	0	0	0	0	0	0	0	0	0.159295	0.0068861	0	0	100		36.3115	0.00595614	0.199556	0.589223	11.7537	0	49.9491	1.1909	0	0	0	100
Warren (2016)	VULC5-35-1		37.0051	0.00865597	0.245613	1.22582	11.7819	0	47.652	2.04021	0.040751	0		100		0	0.246729	0	4.86161	5.66856	75.803	13.2128	0	0	0	0	0	0	0	0	0.19725	0.0100682	0	0	100		37.0051	0.00865597	0.245613	1.22582	11.7819	0	47.652	2.04021	0.040751	0	0	100
Warren (2016)	VULC5-41-30		37.5414	0.0459403	0.265883	2.03362	11.4829	0	46.5084	2.08327	0.0385711	0		100		0	0.233609	0	8.20879	5.79016	69.8397	15.6607	0	0	0	0	0	0	0	0	0.213601	0.053454	0	0	100		37.5414	0.0459403	0.265883	2.03362	11.4829	0	46.5084	2.08327	0.0385711	0	0	100
Warren (2016)	ANTP-126-HD2		37.0091	8.64689e-05	0.248769	1.53362	11.0589	0	47.8035	2.29271	0.0532157	0		100		0	0.321163	0	6.05207	6.34968	75.6612	11.4167	0	0	0	0	0	0	0	0	0.199143	0.000100254	0	0	100		37.0091	8.64689e-05	0.248769	1.53362	11.0589	0	47.8035	2.29271	0.0532157	0	0	100
Warren (2016)	Kn180-14-66		36.5971	0.014706	0.23728	1.0324	11.8935	0	49.1181	1.08857	0.0183724	0		100		0	0.110747	0	4.15342	3.0112	79.6382	12.8797	0	0	0	0	0	0	0	0	0.189719	0.0170301	0	0	100		36.5971	0.014706	0.23728	1.0324	11.8935	0	49.1181	1.08857	0.0183724	0	0	100
Warren (2016)	920D-12R3-29-35		35.9992	0.00821444	0.155411	0.959512	11.9784	0	50.1924	0.703324	0.0034832	0		100		0	0.0209397	0	3.91513	1.94028	84.098	9.89221	0	0	0	0	0	0	0	0	0.123925	0.00948697	0	0	100		35.9992	0.00821444	0.155411	0.959512	11.9784	0	50.1924	0.703324	0.0034832	0	0	100
Warren (2016)	IO11/76-59-78		36.8019	0.0262459	0.274007	1.46547	11.5228	0	48.6331	1.25189	0.0244895	0		100		0	0.147537	0	5.90002	3.46101	77.1327	13.1094	0	0	0	0	0	0	0	0	0.218961	0.0303766	0	0	100		36.8019	0.0262459	0.274007	1.46547	11.5228	0	48.6331	1.25189	0.0244895	0	0	100
Warren (2016)	EDUL-64-1-5		37.9232	0.0160891	0.370602	1.78446	11.4117	0	46.6975	1.78675	0.00973086	0		100		0	0.0588769	0	7.31254	4.96106	68.2146	19.1368	0	0	0	0	0	0	0	0	0.29743	0.0187018	0	0	100		37.9232	0.0160891	0.370602	1.78446	11.4117	0	46.6975	1.78675	0.00973086	0	0	100
Warren (2016)	VULC5-35-37		37.1736	0.00512457	0.271639	1.39058	11.3093	0	48.0725	1.76052	0.0167748	0		100		0	0.101187	0	5.63676	4.87335	74.9028	14.2626	0	0	0	0	0	0	0	0	0.217343	0.00593861	0	0	100		37.1736	0.00512457	0.271639	1.39058	11.3093	0	48.0725	1.76052	0.0167748	0	0	100
Warren (2016)	Naut-SP03-10		36.7773	0.0202612	0.254629	1.36281	11.4162	0	48.7522	1.39372	0.0228499	0		100		0	0.13761	0	5.48437	3.85177	77.7289	12.5705	0	0	0	0	0	0	3.46945e-18	0	0.203403	0.0234417	0	0	100		36.7773	0.0202612	0.254629	1.36281	11.4162	0	48.7522	1.39372	0.0228499	0	0	100
Warren (2016)	VULC5-41-63		36.289	0.0333535	0.135921	2.18077	12.3216	0	47.3084	1.68979	0.0411776	0		100		0	0.249651	0	8.81266	4.70135	76.7852	9.23708	0	0	0	0	0.0658904	0	0	0	0.109306	0.0388483	0	0	100		36.289	0.0333535	0.135921	2.18077	12.3216	0	47.3084	1.68979	0.0411776	0	0	100
Warren (2016)	AII20-17-77		37.8691	0.0186405	0.0897711	1.32881	10.7867	0	48.8495	1.03084	0.0266098	0		100		0	0.159448	0	5.29991	2.83457	72.9502	18.6631	0	0	0	0	0	0	0	0	0.0713507	0.0214581	0	0	100		37.8691	0.0186405	0.0897711	1.32881	10.7867	0	48.8495	1.03084	0.0266098	0	0	100
Warren (2016)	EDUL-56-3-8		37.2478	0.020518	0.262464	1.7808	11.954	0	47.0415	1.67278	0.0200555	0		100		0	0.121505	0	7.25697	4.65068	72.262	15.474	0	0	0	0	0	0	0	0	0.210919	0.023881	0	0	100		37.2478	0.020518	0.262464	1.7808	11.954	0	47.0415	1.67278	0.0200555	0	0	100
Warren (2016)	ANTP-126-D5		36.9979	0.000801165	0.153089	1.49925	11.4701	0	48.2398	1.61826	0.0207614	0		100		0	0.125173	0	6.06135	4.47734	76.0484	13.1644	0	0	0	0	0	0	0	0	0.122428	0.000927969	0	0	100		36.9979	0.000801165	0.153089	1.49925	11.4701	0	48.2398	1.61826	0.0207614	0	0	100
Warren (2016)	ANTP-134-HD3		37.233	0.0205487	0.348828	1.39505	10.654	0	48.5832	1.72493	0.0403935	0		100		0	0.242749	0	5.5205	4.75703	75.3104	13.8675	0	0	0	0	0	0	0	0	0.278062	0.023724	0	0	100		37.233	0.0205487	0.348828	1.39505	10.654	0	48.5832	1.72493	0.0403935	0	0	100
Warren (2016)	CD57-D1-1B-1		36.8996	0.0350899	0.288093	2.19526	12.2351	0	46.6362	1.67266	0.038019	0		100		0	0.230793	0	8.89912	4.65958	72.4184	13.4526	0	0	0	0	0.0666757	0	0	0	0.231973	0.0409224	0	0	100		36.8996	0.0350899	0.288093	2.19526	12.2351	0	46.6362	1.67266	0.038019	0	0	100
Warren (2016)	V3306-IN18-B		36.9841	0.0617102	0.224653	1.9736	11.8792	0	46.734	2.08517	0.0575717	0		100		0	0.349202	0	7.88053	5.80399	73.1904	12.5233	0	0	0	0	0	0	0	0	0.180744	0.0719088	0	0	100		36.9841	0.0617102	0.224653	1.9736	11.8792	0	46.734	2.08517	0.0575717	0	0	100
Warren (2016)	1274A-27R1-87-90		36.317	0.00947403	0.169911	0.598236	11.4133	0	50.6009	0.870583	0.020628	0		100		0	0.123672	0	2.34586	2.3952	84.0039	10.9854	0	0	0	0	0	0	0	0	0.13512	0.010912	0	0	100		36.317	0.00947403	0.169911	0.598236	11.4133	0	50.6009	0.870583	0.020628	0	0	100
Warren (2016)	S18-35-04		37.772	0.00730231	0.332965	1.43861	11.4488	0	48.5467	0.445797	0.00791011	0		100		0	0.0475417	0	5.85573	1.22955	71.821	20.7723	0	0	0	0	0	0	0	0	0.265445	0.00843157	0	0	100		37.772	0.00730231	0.332965	1.43861	11.4488	0	48.5467	0.445797	0.00791011	0	0	100
Warren (2016)	670A-2R1-20-23		36.254	0.0128683	0.216922	0.969868	11.6466	0	50.3555	0.517686	0.0265067	0		100		0	0.159002	0	3.83848	1.42506	83.0368	11.3533	0	0	0	0	0	0	0	0	0.172598	0.0148295	0	0	100		36.254	0.0128683	0.216922	0.969868	11.6466	0	50.3555	0.517686	0.0265067	0	0	100
Warren (2016)	V3306-IN19-C		37.2923	0.0240851	0.210673	2.19747	12.0501	0	45.1237	3.07836	0.0232178	0		100		0	0.141685	0	9.02741	8.62063	68.5924	13.2237	0	0	0	0	0.195412	0	3.46945e-18	0	0.170527	0.0282364	0	0	100		37.2923	0.0240851	0.210673	2.19747	12.0501	0	45.1237	3.07836	0.0232178	0	0	100
Warren (2016)	ANTP-87-HD9		36.3273	2.59815e-05	0.0809465	0.627863	11.1973	0	51.0654	0.691825	0.00936526	0		100		0	0.0559959	0	2.51413	1.89823	84.6011	10.8663	0	0	0	0	0	0	0	0	0.0641975	2.9844e-05	0	0	100		36.3273	2.59815e-05	0.0809465	0.627863	11.1973	0	51.0654	0.691825	0.00936526	0	0	100
Warren (2016)	395A-18R1-2f		36.3236	0.0172585	0.260598	0.823314	11.7941	0	49.5284	1.24105	0.0116528	0		100		0	0.0702105	0	3.3252	3.43144	81.887	11.0579	0	0	0	0	0	0	0	0	0.208269	0.019977	0	0	100		36.3236	0.0172585	0.260598	0.823314	11.7941	0	49.5284	1.24105	0.0116528	0	0	100
Warren (2016)	JR31-52-03		38.8263	0.0307414	0.404659	2.4845	11.1866	0	45.1613	1.85732	0.0485821	0		100		0	0.294334	0	10.0249	5.16379	60.5159	23.6402	0	0	0	0	0	0	0	0	0.32519	0.0357804	0	0	100		38.8263	0.0307414	0.404659	2.4845	11.1866	0	45.1613	1.85732	0.0485821	0	0	100
Warren (2016)	IO11/76-58-34		37.1932	0.0113207	0.315256	1.93676	12.0675	0	47.2165	1.22922	0.0301416	0		100		0	0.182446	0	7.84501	3.41438	72.289	16.0029	0	0	0	0	0	0	0	0	0.253113	0.0131643	0	0	100		37.1932	0.0113207	0.315256	1.93676	12.0675	0	47.2165	1.22922	0.0301416	0	0	100
Warren (2016)	395A-18R2-17g		38.9662	0.0316861	0.472689	1.73684	10.691	0	47.0955	0.995111	0.0109933	0		100		0	0.0661208	0	7.0679	2.74663	63.2836	26.422	0	0	0	0	0	0	1.73472e-18	0	0.377112	0.0366132	0	0	100		38.9662	0.0316861	0.472689	1.73684	10.691	0	47.0955	0.995111	0.0109933	0	0	100
Warren (2016)	IO11/76-59-95		36.987	0.0169915	0.403973	1.6722	11.3884	0	47.7499	1.72817	0.0533929	0		100		0	0.322473	0	6.62626	4.78978	74.7659	13.1522	0	0	0	0	0	0	0	0	0.323629	0.0197151	0	0	100		36.987	0.0169915	0.403973	1.6722	11.3884	0	47.7499	1.72817	0.0533929	0	0	100
Warren (2016)	JR31-52-08		38.3286	0.0383486	0.313285	1.97043	11.4113	0	45.4758	2.39111	0.071073	0		100		0	0.431449	0	7.80835	6.66106	64.9618	19.8404	0	0	0	0	0	0	0	0	0.252261	0.0447232	0	0	100		38.3286	0.0383486	0.313285	1.97043	11.4113	0	45.4758	2.39111	0.071073	0	0	100
Warren (2016)	670A-7R1-25-27		36.372	0.020878	0.238985	1.35305	12.0677	0	48.9212	1.01291	0.0132581	0		100		0	0.0799864	0	5.50024	2.80428	79.7332	11.6669	0	0	0	0	0	0	0	0	0.191244	0.0241981	0	0	100		36.372	0.020878	0.238985	1.35305	12.0677	0	48.9212	1.01291	0.0132581	0	0	100
Warren (2016)	VULC5-41-29		36.4505	0.0226335	0.285609	1.52978	11.5996	0	47.4543	2.59444	0.0630964	0		100		0	0.382447	0	6.01458	7.21652	77.929	8.2015	0	0	0	0	0	0	0	0	0.229627	0.0263558	0	0	100		36.4505	0.0226335	0.285609	1.52978	11.5996	0	47.4543	2.59444	0.0630964	0	0	100
Warren (2016)	IO11/76-58-10		37.8223	0.0246836	0.436433	2.0091	11.4723	0	45.7138	2.43382	0.087591	0		100		0	0.531996	0	7.89218	6.78351	67.6118	16.8001	0	0	0	0	0	0	0	0	0.351602	0.0288015	0	0	100		37.8223	0.0246836	0.436433	2.0091	11.4723	0	45.7138	2.43382	0.087591	0	0	100
Warren (2016)	VULC5-35-36		37.0362	0.0185825	0.231618	1.39228	11.1485	0	48.7771	1.38042	0.0153697	0		100		0	0.0924238	0	5.63298	3.80931	76.448	13.811	0	0	0	0	0	0	0	0	0.184745	0.0214674	0	0	100		37.0362	0.0185825	0.231618	1.39228	11.1485	0	48.7771	1.38042	0.0153697	0	0	100
Warren (2016)	IO11/76-60-61		36.3514	0.0281858	0.244182	0.80093	11.5874	0	49.9835	0.956224	0.0481186	0		100		0	0.289156	0	3.04941	2.63692	82.6327	11.1646	0	0	0	0	0	0	0	0	0.194633	0.0325392	0	0	100		36.3514	0.0281858	0.244182	0.80093	11.5874	0	49.9835	0.956224	0.0481186	0	0	100
Warren (2016)	ANTP-134-HD8		36.2881	0.0147313	0.292452	1.00809	10.7841	0	49.8657	1.70386	0.0429108	0		100		0	0.257487	0	3.91732	4.6918	82.5803	8.30336	0	0	0	0	0	0	6.93889e-18	0	0.232769	0.0169819	0	0	100		36.2881	0.0147313	0.292452	1.00809	10.7841	0	49.8657	1.70386	0.0429108	0	0	100
Warren (2016)	670A-5R2-139-142		36.486	0.0147362	0.206967	1.25441	11.9479	0	49.3782	0.698225	0.0135482	0		100		0	0.0815451	0	5.08127	1.92853	79.9795	12.7468	0	0	0	0	0	0	0	0	0.165234	0.0170395	0	0	100		36.486	0.0147362	0.206967	1.25441	11.9479	0	49.3782	0.698225	0.0135482	0	0	100
Warren (2016)	670A-9R1-63-65		35.7388	0.00648319	0.168394	0.63701	12.2195	0	50.7349	0.49486	0	0		100		0	0	0	2.61014	1.36508	86.5928	9.29023	0	0	0	0	0	0	0	0	0.134268	0.00748696	0	0	100		35.7388	0.00648319	0.168394	0.63701	12.2195	0	50.7349	0.49486	0	0	0	100
Warren (2016)	670A-5R1-8-11		35.6994	0.0141476	0.177185	1.20344	12.2755	0	49.3633	1.25828	0.00869041	0		100		0	0.0524729	0	4.91113	3.48648	84.1404	7.25115	0	0	0	0	0	0	0	0	0.141907	0.016411	0	0	100		35.6994	0.0141476	0.177185	1.20344	12.2755	0	49.3633	1.25828	0.00869041	0	0	100
Warren (2016)	JR31-52-05		37.5154	0.0283885	0.32681	2.3156	11.5407	0	46.3187	1.90574	0.0486336	0		100		0	0.294589	0	9.3253	5.29738	69.081	15.7061	0	0	0	0	0	0	0	0	0.262579	0.0330354	0	0	100		37.5154	0.0283885	0.32681	2.3156	11.5407	0	46.3187	1.90574	0.0486336	0	0	100
Warren (2016)	PS86-6-40		37.288	0.0738719	0.246042	2.44935	11.8167	0	45.2607	2.72679	0.138512	0		100		0	0.843225	0	9.4894	7.61772	69.4929	12.25	0	0	0	0	0.0217579	0	0	0	0.198678	0.0863956	0	0	100		37.288	0.0738719	0.246042	2.44935	11.8167	0	45.2607	2.72679	0.138512	0	0	100
Warren (2016)	AII107-61-78		37.7778	0.0223225	0.212389	2.20064	11.3355	0	46.0118	2.3583	0.0812832	0		100		0	0.492473	0	8.69445	6.5569	68.3563	15.7032	0	0	0	0	0	0	0	0	0.170686	0.0259826	0	0	100		37.7778	0.0223225	0.212389	2.20064	11.3355	0	46.0118	2.3583	0.0812832	0	0	100
Warren (2016)	895C-1R1-28-32		35.7675	0.0116423	0.171128	0.574256	11.7381	0	50.8664	0.870957	0	0		100		0	0	0	2.34974	2.39922	86.8881	8.21322	0	0	0	0	0	0	0	0	0.136257	0.0134262	0	0	100		35.7675	0.0116423	0.171128	0.574256	11.7381	0	50.8664	0.870957	0	0	0	100
Warren (2016)	SDM-4-1-37		37.7369	0.015874	0.363691	1.75264	11.1516	0	48.1653	0.809491	0.00450802	0		100		0	0.0271012	0	7.16045	2.23322	70.8767	19.3941	0	0	0	0	0	0	0	0	0.290014	0.0183335	0	0	100		37.7369	0.015874	0.363691	1.75264	11.1516	0	48.1653	0.809491	0.00450802	0	0	100
Warren (2016)	920B-12R4-84-90		35.9659	0.0129316	0.211152	0.763348	11.8522	0	49.0137	2.17573	0.00505552	0		100		0	0.0305714	0	3.12205	6.0377	83.4884	7.13687	0	0	0	0	0	0	0	0	0.169367	0.0150231	0	0	100		35.9659	0.0129316	0.211152	0.763348	11.8522	0	49.0137	2.17573	0.00505552	0	0	100
Warren (2016)	VULC5-35-47		36.864	0.024986	0.215158	1.50177	11.9214	0	47.467	1.96624	0.0395073	0		100		0	0.239336	0	6.00993	5.46617	75.6668	12.4158	0	0	0	0	0	0	0	0	0.17289	0.0290792	0	0	100		36.864	0.024986	0.215158	1.50177	11.9214	0	47.467	1.96624	0.0395073	0	0	100
Warren (2016)	Van7-96-25		36.9795	0.0587775	0.0890503	2.52022	12.4218	0	45.4891	2.30793	0.133586	0		100		0	0.813723	0	9.81332	6.4514	70.4024	12.0313	0	0	0	0	0.347127	0	0	0	0.0719504	0.0687832	0	0	100		36.9795	0.0587775	0.0890503	2.52022	12.4218	0	45.4891	2.30793	0.133586	0	0	100
Warren (2016)	IO11/76-56-10		36.8682	0.0292863	0.170007	1.75113	11.3952	0	47.3837	2.30097	0.101458	0		100		0	0.613468	0	6.72666	6.38461	75.8393	10.2656	0	0	0	0	0	0	0	0	0.13635	0.0340195	0	0	100		36.8682	0.0292863	0.170007	1.75113	11.3952	0	47.3837	2.30097	0.101458	0	0	100
Warren (2016)	ANTP-126-HD5		37.3531	0	0.132711	1.67695	11.1224	0	47.1706	2.50655	0.0376449	0		100		0	0.227501	0	6.72606	6.95138	73.0362	12.9524	0	0	0	0	0	0	0	0	0.106382	0	0	0	100		37.3531	0	0.132711	1.67695	11.1224	0	47.1706	2.50655	0.0376449	0	0	100
Warren (2016)	CD57-D2-2-2		38.3658	0.0435972	0.40548	2.30728	11.4221	0	45.3765	2.04499	0.0342479	0		100		0	0.207812	0	9.37696	5.69437	63.2884	21.0553	0	0	0	0	0	0	0	0	0.326355	0.050822	0	0	100		38.3658	0.0435972	0.40548	2.30728	11.4221	0	45.3765	2.04499	0.0342479	0	0	100
Warren (2016)	AII107-40-6		36.6243	0.0121628	0.210031	0.815388	11.5667	0	49.3181	1.451	0.00228345	0		100		0	0.0137527	0	3.33648	4.01035	80.2904	12.1672	0	0	0	0	0	0	0	0	0.16779	0.0140731	0	0	100		36.6243	0.0121628	0.210031	0.815388	11.5667	0	49.3181	1.451	0.00228345	0	0	100
Warren (2016)	EDUL-56-3-11		37.0082	0.0208965	0.229204	1.73772	12.101	0	47.0433	1.8387	0.0210291	0		100		0	0.127541	0	7.08197	5.11752	73.6633	13.8009	0	0	0	0	0	0	0	0	0.18439	0.0243479	0	0	100		37.0082	0.0208965	0.229204	1.73772	12.101	0	47.0433	1.8387	0.0210291	0	0	100
Warren (2016)	920D-22R5-3-9		38.8564	0.0161425	0.409174	1.80766	11.1191	0	46.1019	1.67498	0.0146867	0		100		0	0.0888001	0	7.37911	4.64748	62.7052	24.8325	0	0	0	0	0	0	0	0	0.328157	0.0187507	0	0	100		38.8564	0.0161425	0.409174	1.80766	11.1191	0	46.1019	1.67498	0.0146867	0	0	100
Warren (2016)	895E-7R4-86-89		35.4536	0.00480764	0.132239	0.456368	12.1627	0	51.2552	0.535066	5.62753e-05	0		100		0	0.000337925	0	1.86772	1.47444	89.147	7.39958	0	0	0	0	0	0	0	0	0.105329	0.00554615	0	0	100		35.4536	0.00480764	0.132239	0.456368	12.1627	0	51.2552	0.535066	5.62753e-05	0	0	100
Warren (2016)	1274A-1R1-88-90		37.1164	0.007863	0.258101	0.700888	10.888	0	49.2215	1.80171	0.00560576	0		100		0	0.0336981	0	2.84499	4.97019	78.0783	13.8579	0	0	0	0	0	0	0	0	0.2058	0.00908063	0	0	100		37.1164	0.007863	0.258101	0.700888	10.888	0	49.2215	1.80171	0.00560576	0	0	100
Warren (2016)	670A-8R1-6-8		36.6922	0.0231502	0.291609	1.58808	11.6387	0	47.7339	2.00413	0.0282559	0		100		0	0.170942	0	6.41216	5.56394	76.4667	11.1254	0	0	0	0	0	0	0	0	0.234004	0.0269061	0	0	100		36.6922	0.0231502	0.291609	1.58808	11.6387	0	47.7339	2.00413	0.0282559	0	0	100
Warren (2016)	670A-9R-94-97		36.9308	0.0139005	0.3153	0.982149	11.5816	0	47.6765	2.46747	0.0322661	0		100		0	0.195493	0	3.8998	6.86046	76.5947	12.18	0	0	0	0	0	0	0	0	0.253392	0.0161797	0	0	100		36.9308	0.0139005	0.3153	0.982149	11.5816	0	47.6765	2.46747	0.0322661	0	0	100
Warren (2016)	P6707B-AT196-AE		38.3486	0.122006	0.308141	3.07405	11.4054	0	42.3893	4.082	0.270517	0		100		0	1.65743	0	11.5124	11.4771	59.9679	14.8521	0	0	0	0	0.139078	0	0	0	0.250422	0.143608	0	0	100		38.3486	0.122006	0.308141	3.07405	11.4054	0	42.3893	4.082	0.270517	0	0	100
Warren (2016)	PS66-256-64		37.1434	0.025757	0.227696	1.97034	11.8317	0	48.528	0.273094	0	0		100		0	0	0	8.0786	0.753819	73.8491	17.107	0	0	0	0	0	0	0	0	0.181667	0.0297639	0	0	100		37.1434	0.025757	0.227696	1.97034	11.8317	0	48.528	0.273094	0	0	0	100
Warren (2016)	V3306-IN19-AB		38.2083	0.0431705	0.325869	1.4318	12.4673	0	46.8014	0.722229	0	0		100		0	0	0	5.91673	2.00925	66.6589	24.9562	0	0	0	0	0.146581	0	0	0	0.262041	0.0502791	0	0	100		38.2083	0.0431705	0.325869	1.4318	12.4673	0	46.8014	0.722229	0	0	0	100
Warren (2016)	IO11/76-56-57		36.4154	0.0265467	0.263962	2.48566	12.205	0	46.93	1.62089	0.0525491	0		100		0	0.318662	0	10.0197	4.51061	74.9587	9.92355	0	0	0	0	0.0255658	0	0	0	0.212319	0.0309267	0	0	100		36.4154	0.0265467	0.263962	2.48566	12.205	0	46.93	1.62089	0.0525491	0	0	100
Warren (2016)	1274A-11R1-11-13		37.9398	0.00902377	0.320603	0.856572	11.1664	0	48.5351	1.16714	0.00533049	0		100		0	0.032068	0	3.48692	3.22214	72.4067	20.5859	0	0	0	0	0	0	0	0	0.255833	0.0104292	0	0	100		37.9398	0.00902377	0.320603	0.856572	11.1664	0	48.5351	1.16714	0.00533049	0	0	100
Warren (2016)	HLY102-70-75		37.5596	0.0319586	0.382105	2.94378	10.7101	0	46.0242	2.24652	0.101731	0		100		0	0.614537	0	11.6299	6.22763	67.7483	13.4364	0	0	0	0	0	0	1.38778e-17	0	0.306169	0.0370886	0	0	100		37.5596	0.0319586	0.382105	2.94378	10.7101	0	46.0242	2.24652	0.101731	0	0	100
Warren (2016)	HLY102-40-18		34.4889	0.00339312	0.0907527	0.892064	10.785	0	53.4837	0.249137	0.00696014	0		100		0	0.041325	0	3.57728	0.678814	95.4549	0	0.172372	0	0	0	0	0	0	0	0.0714724	0.00387036	0	0	100		34.4889	0.00339312	0.0907527	0.892064	10.785	0	53.4837	0.249137	0.00696014	0	0	100
Warren (2016)	920D-22R2-73-77		37.2636	0.0233917	0.307501	1.96304	10.9712	0	47.1432	2.31842	0.00974307	0		100		0	0.058856	0	8.03607	6.42693	72.076	13.1286	0	0	0	0	0	0	0	0	0.246391	0.0271465	0	0	100		37.2636	0.0233917	0.307501	1.96304	10.9712	0	47.1432	2.31842	0.00974307	0	0	100
Warren (2016)	Van7-85-27		37.7484	0.0342121	0.274855	1.61984	11.1679	0	47.5885	1.52923	0.0371272	0		100		0	0.223813	0	6.4771	4.23041	70.9746	17.8347	0	0	0	0	0	0	0	0	0.219776	0.0396215	0	0	100		37.7484	0.0342121	0.274855	1.61984	11.1679	0	47.5885	1.52923	0.0371272	0	0	100
Warren (2016)	670A-6R1-4-6		36.6564	0.0209377	0.246021	0.825596	11.6563	0	48.8281	1.73694	0.0297006	0		100		0	0.179269	0	3.25334	4.81108	79.6728	11.8622	0	0	0	0	0	0	0	0	0.196968	0.0242788	0	0	100		36.6564	0.0209377	0.246021	0.825596	11.6563	0	48.8281	1.73694	0.0297006	0	0	100
Warren (2016)	RC27-9-46-2		36.897	0.0207686	0.272927	1.18997	12.0366	0	48.6535	0.910693	0.0185593	0		100		0	0.111987	0	4.80481	2.52171	77.0459	15.2731	0	0	0	0	0	0	0	0	0.218442	0.0240752	0	0	100		36.897	0.0207686	0.272927	1.18997	12.0366	0	48.6535	0.910693	0.0185593	0	0	100
[truncated: 30 more columns]
